# Supplementary material for: Metastasis of Uveal Melanoma with Monosomy-3 Is Associated with a Less Glycogenetic Gene Expression Profile and the Dysregulation of Glycogen Storage
Source: PubMed Central journal article supplement (PMC7463985; doi:10.3390/cancers12082101), 2020-07-29
Supplement: cancers-12-02101-s001.pdf [file cancers-12-02101-s001.pdf]

Article

**Metastasis of Uveal Melanoma with Monosomy-3 is Associated with a Less Glycogenetic Gene Expression Profile and the Dysregulation of Glycogen Storage**

Siranush Vardanyan, Anton Brosig, Hartmut Merz, Mahdy Ranjbar, Vinodh Kakkassery, Salvatore Grisanti, and Aysegül Tura

**Supplementary Materials:**

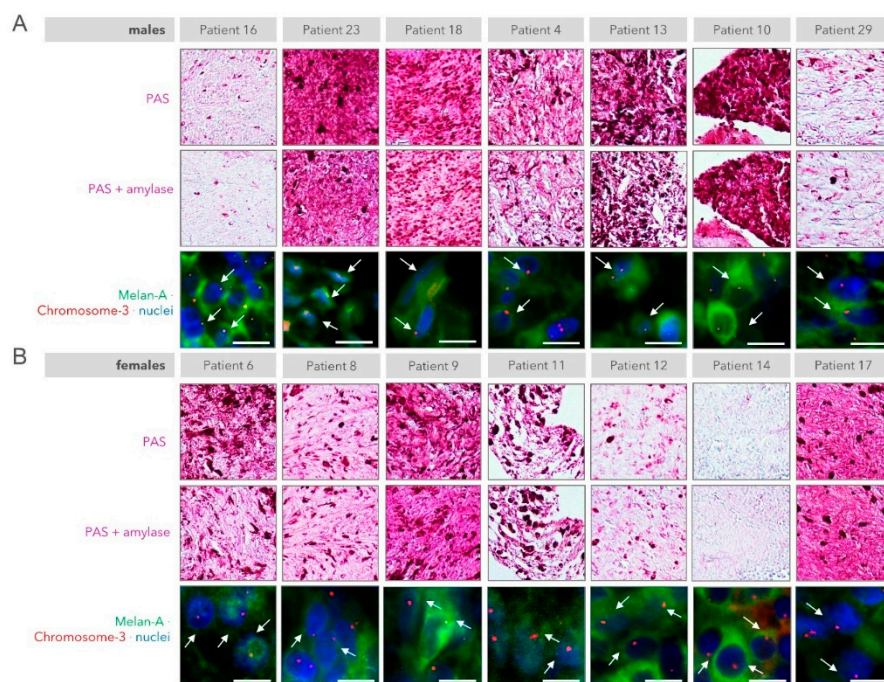

**Figure S1.** Estimated levels of the amylase-sensitive glycogen in the monosomy-3 tumors of the male versus female patients (n=7 each). **(A)** The amylase pretreatment has led to a slight to moderate weakening in the intensity of the PAS staining in all the male patients except for Patient #29, who did not demonstrate any difference (rightmost panel). **(B)** The tumors of the female patients did not exhibit a noticeable decline in the intensity of the PAS staining except for Patient #6 (leftmost panel), suggesting that the amylase-sensitive glycogen was less abundant in the monosomy-3 tumors of females. All the images of the PAS-stainings were acquired under an original magnification of 100X. The copy number of chromosome-3 (red) together with the melanoma marker protein Melan-A (green) was analyzed by Immuno-FISH. Nuclei were counterstained in blue with DAPI. Arrows indicate several examples of cells with monosomy-3. Scale bars

**Table S1. Human genes involved in glycogen synthesis and breakdown (n = 67).**

| Supplementary Table S1                                                                                                                 |                 |                                        |          |                                                    |                     |                      |                  |                |                                                |           |                     |            |                     |           |                  |                |                                    |
|----------------------------------------------------------------------------------------------------------------------------------------|-----------------|----------------------------------------|----------|----------------------------------------------------|---------------------|----------------------|------------------|----------------|------------------------------------------------|-----------|---------------------|------------|---------------------|-----------|------------------|----------------|------------------------------------|
| not corrected for gene copy number:<br>Tumors with complete information on the copy numbers of<br>chromosome 3p and 3q                 |                 |                                        |          |                                                    |                     |                      |                  |                |                                                |           |                     |            |                     |           |                  |                |                                    |
| corrected for gene copy number:<br>Exclusion of the tumors with aberrations on the other chromosomes<br>that harbor the analyzed genes |                 |                                        |          |                                                    |                     |                      |                  |                |                                                |           |                     |            |                     |           |                  |                |                                    |
| 1. Preparatory steps / Dual regulators of glycogen synthesis* (n=6 genes)                                                              |                 |                                        |          |                                                    |                     |                      |                  |                |                                                |           |                     |            |                     |           |                  |                |                                    |
| Symbol                                                                                                                                 | NCBI<br>Gene ID | Name                                   | Locus    | Expression<br>(not corrected for gene copy number) |                     |                      |                  |                | Expression<br>(corrected for gene copy number) |           |                     |            |                     |           |                  |                | References<br>for gene<br>function |
|                                                                                                                                        |                 |                                        |          | All<br>(n=77)                                      | Disomy-3<br>(n=38)  | Monosomy-3<br>(n=39) | p - value        |                | All                                            | Disomy -3 |                     | Monosomy-3 |                     | p - value |                  |                |                                    |
|                                                                                                                                        |                 |                                        |          | Mean ±<br>SD                                       | Median<br>(range)   | Median<br>(range)    | un-<br>corrected | corrected<br>† | Mean ±<br>SD                                   | n         | Median<br>(range)   | n          | Median<br>(range)   | n         | un-<br>corrected | corrected<br>† |                                    |
| GCK                                                                                                                                    | 2645            | glucokinase                            | 7p13     | 9.0 ± 3.3                                          | 9.0<br>(0.0-14.7)   | 9.7<br>(0.0-14.2)    | 0.21             | 1.00           | 8.9 ± 3.4                                      | 71        | 9.0<br>(0.0-14.7)   | 36         | 9.7<br>(0.0-14.2)   | 35        | 0.19             | 1.00           | [30]                               |
| PGM1*                                                                                                                                  | 5236            | phosphoglucomutase<br>1                | 1p31.3   | 17.0 ± 1.4                                         | 15.8<br>(13.3-18.8) | 17.6<br>(15.9-18.9)  | 0.00             | 0.11           | 17.1 ± 1.4                                     | 56        | 16.9<br>(13.3-18.8) | 32         | 17.7<br>(16.8-18.9) | 24        | 0.02             | 1.00           | [16,37,38]                         |
| PGM2*                                                                                                                                  | 55276           | phosphoglucomutase<br>2                | 4p14     | 17.3 ± 0.8                                         | 17.0<br>(15.0-18.3) | 17.7<br>(16.0-19.5)  | 0.00             | 0.00           | 17.2 ± 0.7                                     | 68        | 17.0<br>(15.0-18.3) | 36         | 17.6<br>(16.0-18.7) | 32        | 0.00             | 0.02           | [16,38]                            |
| PGM3*                                                                                                                                  | 5238            | phosphoglucomutase<br>3                | 6q14.1   | 15.5 ± 0.8                                         | 15.6<br>(13.6-16.6) | 15.6<br>(13.8-16.8)  | 0.58             | 1.00           | 15.7 ± 0.7                                     | 50        | 15.7<br>(14.0-16.6) | 24         | 16.0<br>(14.0-16.8) | 26        | 0.28             | 1.00           | [16,38]                            |
| PGM5*                                                                                                                                  | 5239            | phosphoglucomutase<br>5                | 9q21.11  | 12.4 ± 1.2                                         | 11.8<br>(8.3-14.2)  | 12.8<br>(10.5-15.5)  | 0.00             | 0.02           | 12.4 ± 1.2                                     | 72        | 11.7<br>(8.3-14.2)  | 36         | 12.8<br>(10.5-15.5) | 36        | 0.00             | 0.00           | [16,38]                            |
| UGP2                                                                                                                                   | 7360            | UDP-glucose<br>pyrophosphorylase 2     | 2p15     | 17.6 ± 0.4                                         | 17.6<br>(16.4-18.7) | 17.9<br>(16.6-18.5)  | 0.40             | 1.00           | 17.6 ± 0.4                                     | 67        | 17.6<br>(16.4-18.4) | 33         | 17.9<br>(16.6-18.2) | 34        | 0.30             | 1.00           | [16]                               |
| 2. De novo glycogen synthesis (n=5 genes)                                                                                              |                 |                                        |          |                                                    |                     |                      |                  |                |                                                |           |                     |            |                     |           |                  |                |                                    |
| Symbol                                                                                                                                 | NCBI<br>Gene ID | Name                                   | Locus    | Expression<br>(not corrected for gene copy number) |                     |                      |                  |                | Expression<br>(corrected for gene copy number) |           |                     |            |                     |           |                  |                | References<br>for gene<br>function |
|                                                                                                                                        |                 |                                        |          | All<br>(n=77)                                      | Disomy-3<br>(n=38)  | Monosomy-3<br>(n=39) | p - value        |                | All                                            | Disomy -3 |                     | Monosomy-3 |                     | p - value |                  |                |                                    |
|                                                                                                                                        |                 |                                        |          | Mean ±<br>SD                                       | Median<br>(range)   | Median<br>(range)    | un-<br>corrected | corrected<br>† | Mean ±<br>SD                                   | n         | Median<br>(range)   | n          | Median<br>(range)   | n         | un-<br>corrected | corrected<br>† |                                    |
| GBE1                                                                                                                                   | 2632            | 1,4-alpha-glucan<br>branching enzyme 1 | 3p12.2   | 16.8 ± 0.7                                         | 17.3<br>(15.6-19.2) | 16.5<br>(15.4-17.1)  | 0.00             | 0.00           | n.a.                                           | n.a.      | n.a.                | n.a.       | n.a.                | n.a.      | n.a.             | n.a.           | [15,16]                            |
| GYG1                                                                                                                                   | 2992            | glycogenin 1                           | 3q24     | 18.3 ± 0.3                                         | 18.4<br>(17.7-19.2) | 18.2<br>(17.5-18.7)  | 0.00             | 0.01           | n.a.                                           | n.a.      | n.a.                | n.a.       | n.a.                | n.a.      | n.a.             | n.a.           | [15,16]                            |
| GYG2                                                                                                                                   | 8908            | glycogenin 2                           | Xp22.33  | 20.8 ± 1.0                                         | 21.3<br>(19.4-23.1) | 20.1<br>(18.9-22.2)  | 0.00             | 0.00           | 20.6 ± 0.9                                     | 55        | 21.2<br>(19.4-22.7) | 29         | 19.9<br>(18.9-22.2) | 26        | 0.00             | 0.00           | [15,16]                            |
| GYS1                                                                                                                                   | 2997            | glycogen synthase 1                    | 19q13.33 | 20.9 ± 0.8                                         | 20.7                | 20.7                 | 0.43             | 1.00           | 20.9 ± 0.8                                     | 75        | 20.6                | 36         | 20.7                | 39        | 0.38             | 1.00           | [15,16,23]                         |

|      |      |                     |         |           |                   |                   |             |      |           |    |                  |             |                   |    |             |      |            |
|------|------|---------------------|---------|-----------|-------------------|-------------------|-------------|------|-----------|----|------------------|-------------|-------------------|----|-------------|------|------------|
|      |      |                     |         |           | (18.7-22.7)       | (19.7-22.2)       |             |      |           |    | (18.7-22.7)      | (19.7-22.2) |                   |    |             |      |            |
| GYS2 | 2998 | glycogen synthase 2 | 12p12.1 | 5.5 ± 4.3 | 0.0<br>(0.0-9.67) | 8.4<br>(0.0-10.7) | <b>0.00</b> | 0.19 | 5.5 ± 4.3 | 72 | 0.0<br>(0.0-9.7) | 37          | 8.3<br>(0.0-10.7) | 35 | <b>0.01</b> | 0.38 | [15,16,23] |

### 3. Positive regulators of glycogen synthesis (n=19 genes)

| Symbol   | NCBI<br><br>Gene ID | Name                                          | Locus    | Expression<br>(not corrected for gene copy number) |                                             |                                               |                  |                | Expression<br>(corrected for gene copy number) |      |                                    |      |                                     |      |                  |                | References<br>for gene<br>function |
|----------|---------------------|-----------------------------------------------|----------|----------------------------------------------------|---------------------------------------------|-----------------------------------------------|------------------|----------------|------------------------------------------------|------|------------------------------------|------|-------------------------------------|------|------------------|----------------|------------------------------------|
|          |                     |                                               |          | All<br>(n=77)<br><br>Mean ±<br>SD                  | Disomy-3<br>(n=38)<br><br>Median<br>(range) | Monosomy-3<br>(n=39)<br><br>Median<br>(range) | p - value        |                | All<br><br>Mean ±<br>SD                        | n    | Disomy -3<br><br>Median<br>(range) | n    | Monosomy-3<br><br>Median<br>(range) | n    | p - value        |                |                                    |
|          |                     |                                               |          |                                                    |                                             |                                               | un-<br>corrected | corrected<br>† |                                                |      |                                    |      |                                     |      | un-<br>corrected | corrected<br>† |                                    |
| ATG7     | 10533               | autophagy related 7                           | 3p25.3   | 16.2 ± 0.4                                         | 16.4<br>(15.8-17.2)                         | 16.0<br>(14.9-17.0)                           | <b>0.00</b>      | <b>0.00</b>    | n.a.                                           | n.a. | n.a.                               | n.a. | n.a.                                | n.a. | n.a.             | n.a.           | [15]                               |
| BAP1     | 8314                | BRCA1 associated protein 1                    | 3p21.1   | 19.0 ± 1.5                                         | 20.2<br>(19.0-21.7)                         | 17.7<br>(15.9-19.8)                           | <b>0.00</b>      | <b>0.00</b>    | n.a.                                           | n.a. | n.a.                               | n.a. | n.a.                                | n.a. | n.a.             | n.a.           | [22]                               |
| EPM2A    | 7957                | EPM2A glucan phosphatase, laforin             | 6q24.3   | 16.2 ± 0.8                                         | 16.7<br>(15.3-17.7)                         | 16.0<br>(14.5-17.2)                           | <b>0.00</b>      | <b>0.00</b>    | 16.5 ± 0.6                                     | 50   | 16.9<br>(15.6-17.6)                | 24   | 16.1<br>(15.5-16.9)                 | 26   | <b>0.00</b>      | <b>0.00</b>    | [16]                               |
| INS      | 3630                | insulin                                       | 11p15.5  | 1.6 ± 4.1                                          | 0.0<br>(0.0-18.4)                           | 0.0<br>(0.0-12.7)                             | 0.89             | 1.00           | 1.7 ± 4.2                                      | 68   | 0.0<br>(0.0-18.4)                  | 34   | 0.0<br>(0.0-12.7)                   | 34   | 0.90             | 1.00           | [23]                               |
| INSR     | 3643                | insulin receptor                              | 19p13.2  | 16.9 ± 0.4                                         | 17.1<br>(16.3-17.9)                         | 16.7<br>(16.2-17.7)                           | <b>0.00</b>      | <b>0.00</b>    | 17.0 ± 0.4                                     | 73   | 17.1<br>(16.5-17.9)                | 35   | 16.7<br>(16.2-17.7)                 | 38   | <b>0.00</b>      | <b>0.00</b>    | [31]                               |
| IRS1     | 3667                | insulin receptor substrate 1                  | 2q36.3   | 17.0 ± 0.9                                         | 17.3<br>(15.2-18.9)                         | 16.9<br>(14.0-19.1)                           | <b>0.01</b>      | 0.52           | 17.0 ± 0.8                                     | 69   | 17.3<br>(15.4-18.9)                | 32   | 16.9<br>(14.0-19.1)                 | 37   | <b>0.01</b>      | 0.43           | [39]                               |
| IRS2     | 8660                | insulin receptor substrate 2                  | 13q34    | 19.0 ± 0.6                                         | 19.2<br>(18.5-20.2)                         | 18.7<br>(17.3-20.2)                           | <b>0.00</b>      | <b>0.00</b>    | 19.0 ± 0.5                                     | 68   | 19.2<br>(18.5-20.1)                | 34   | 18.8<br>(17.6-19.7)                 | 34   | <b>0.00</b>      | <b>0.00</b>    | [32]                               |
| IRS4     | 8471                | insulin receptor substrate 4                  | Xq22.3   | 10.7 ± 3.8                                         | 13.6<br>(0.0-15.7)                          | 10.3<br>(0.0-13.1)                            | <b>0.00</b>      | <b>0.00</b>    | 10.7 ± 4.0                                     | 55   | 13.6<br>(0.0-15.7)                 | 29   | 10.5<br>(0.0-13.1)                  | 26   | <b>0.00</b>      | <b>0.02</b>    | [33]                               |
| NNAT     | 4826                | neuronatin                                    | 20q11.23 | 12.7 ± 2.5                                         | 12.6<br>(0.0-19.5)                          | 12.7<br>(9.0-18.6)                            | 0.39             | 1.00           | 12.6 ± 2.5                                     | 68   | 12.6<br>(0.0-19.5)                 | 34   | 12.7<br>(9.0-18.6)                  | 34   | 0.31             | 1.00           | [40]                               |
| PPARGC1A | 10891               | PPARG coactivator 1 alpha                     | 4p15.2   | 10.1 ± 3.0                                         | 11.2<br>(0.0-15.7)                          | 9.4<br>(0.0-14.1)                             | <b>0.01</b>      | 0.46           | 10.3 ± 3.1                                     | 68   | 11.2<br>(0.0-15.7)                 | 36   | 9.6<br>(0.0-14.1)                   | 32   | <b>0.03</b>      | 1.00           | [41]                               |
| PPP1CA   | 5499                | protein phosphatase 1 catalytic subunit alpha | 11q13.2  | 21.0 ± 0.6                                         | 21.0<br>(19.8-22.4)                         | 21.0<br>(20.2-22.3)                           | 0.32             | 1.00           | 20.9 ± 0.6                                     | 66   | 20.9<br>(19.8-22.1)                | 31   | 21.0<br>(20.2-22.0)                 | 35   | 0.22             | 1.00           | [15]                               |
| PPP1CB   | 5500                | protein phosphatase 1 catalytic subunit beta  | 2p23.2   | 19.2 ± 0.6                                         | 19.1<br>(18.1-20.1)                         | 19.4<br>(17.2-20.5)                           | 0.81             | 1.00           | 19.2 ± 0.6                                     | 67   | 19.1<br>(18.1-20.1)                | 33   | 19.3<br>(17.2-20.0)                 | 34   | 0.63             | 1.00           | [15]                               |
| PPP1CC   | 5501                | protein phosphatase 1 catalytic subunit gamma | 12q24.11 | 18.9 ± 0.4                                         | 19.1<br>(18.1-20.1)                         | 18.7<br>(18.0-19.7)                           | <b>0.01</b>      | 0.46           | 18.9 ± 0.4                                     | 72   | 19.1<br>(18.1-20.1)                | 37   | 18.7<br>(18.0-19.6)                 | 35   | <b>0.00</b>      | 0.10           | [15,16]                            |
| PPP1R3A  | 5506                | protein phosphatase 1 regulatory subunit 3A   | 7q31.1   | 0.5 ± 1.8                                          | 0.0<br>(0.0-0.0)                            | 0.0<br>(0.0-8.61)                             | <b>0.02</b>      | 1.00           | 0.5 ± 1.9                                      | 72   | 0.0<br>(0.0-0.0)                   | 37   | 0.0<br>(0.0-8.6)                    | 35   | <b>0.02</b>      | 1.00           | [15,16]                            |

|         |       |                                                            |          |            |                     |                     |                 |             |            |    |                     |    |                     |    |             |             |         |
|---------|-------|------------------------------------------------------------|----------|------------|---------------------|---------------------|-----------------|-------------|------------|----|---------------------|----|---------------------|----|-------------|-------------|---------|
| PPP1R3B | 79660 | protein phosphatase 1 regulatory subunit 3B                | 8p23.1   | 17.2 ± 1.1 | 18.0<br>(16.1-20.4) | 16.5<br>(15.1-17.7) | <b>0.00</b>     | <b>0.00</b> | 17.4 ± 0.8 | 44 | 17.9<br>(16.1-18.7) | 29 | 16.7<br>(15.8-17.7) | 15 | <b>0.00</b> | <b>0.00</b> | [15,16] |
| PPP1R3C | 5507  | protein phosphatase 1 regulatory subunit 3C                | 10q23.32 | 18.6 ± 1.5 | 19.6<br>(15.9-21.4) | 17.7<br>(15.0-19.5) | <b>0.00</b>     | <b>0.00</b> | 18.6 ± 1.5 | 76 | 19.6<br>(15.9-21.4) | 38 | 17.7<br>(15.0-19.5) | 38 | <b>0.00</b> | <b>0.00</b> | [15,16] |
| PPP1R3D | 5509  | protein phosphatase 1 regulatory subunit 3D                | 20q13.33 | 16.6 ± 0.3 | 16.6<br>(16.0-18.2) | 16.6<br>(16.1-17.4) | 0.92            | 1.00        | 16.6 ± 0.3 | 68 | 16.6<br>(16.0-17.1) | 34 | 16.6<br>(16.1-17.1) | 34 | 0.79        | 1.00        | [15,16] |
| PRKAG2  | 51422 | protein kinase AMP-activated non-catalytic subunit gamma 2 | 7q36.1   | 16.1 ± 0.5 | 16.2<br>(14.9-17.0) | 16.0<br>(15.1-17.2) | <b>&lt;0.05</b> | 1.00        | 16.1 ± 0.4 | 71 | 16.2<br>(14.9-17.0) | 36 | 16.0<br>(15.1-16.6) | 35 | <b>0.02</b> | 1.00        | [15]    |
| TRIM7   | 81786 | tripartite motif containing 7                              | 5q35.3   | 11.6 ± 1.2 | 11.8<br>(9.4-15.6)  | 11.3<br>(9.2-13.1)  | <b>0.02</b>     | 1.00        | 11.6 ± 1.1 | 70 | 11.8<br>(9.4-15.6)  | 34 | 11.3<br>(9.2-13.1)  | 36 | 0.10        | 1.00        | [16]    |

#### 4. Negative regulators of glycogen synthesis (n=37 genes)

| Symbol | NCBI<br><br>Gene ID | Name                                                     | Locus    | Expression<br>(not corrected for gene copy number) |                     |                      |                  |                | Expression<br>(corrected for gene copy number) |    |                     |    |                     |    |                  | References<br>for gene<br>function |                |
|--------|---------------------|----------------------------------------------------------|----------|----------------------------------------------------|---------------------|----------------------|------------------|----------------|------------------------------------------------|----|---------------------|----|---------------------|----|------------------|------------------------------------|----------------|
|        |                     |                                                          |          | All<br>(n=77)                                      | Disomy-3<br>(n=38)  | Monosomy-3<br>(n=39) | p - value        |                | All                                            |    | Disomy -3           |    | Monosomy-3          |    | p - value        |                                    |                |
|        |                     |                                                          |          | Mean ±<br>SD                                       | Median<br>(range)   | Median<br>(range)    | un-<br>corrected | corrected<br>† | Mean ±<br>SD                                   | n  | Median<br>(range)   | n  | Median<br>(range)   | n  | un-<br>corrected |                                    | corrected<br>† |
| AGL    | 178                 | amylo-alpha-1, 6-glucosidase, 4-alpha-glucanotransferase | 1p21.2   | 15.0 ± 0.9                                         | 14.9<br>(12.9-16.5) | 14.9<br>(12.9-16.6)  | 0.97             | 1.00           | 15.2 ± 0.8                                     | 56 | 15.0<br>(13.7-16.5) | 32 | 15.5<br>(13.8-16.6) | 24 | 0.23             | 1.00                               | [15]           |
| AMY1A  | 276                 | amylase alpha 1A                                         | 1p21.1   | 1.3 ± 3.0                                          | 0.0<br>(0.0-8.8)    | 0.0<br>(0.0-9.4)     | 0.28             | 1.00           | 1.2 ± 2.9                                      | 56 | 0.0<br>(0.0-8.8)    | 32 | 0.0<br>(0.0-8.3)    | 24 | 0.75             | 1.00                               | [15,44]        |
| AMY1B  | 277                 | amylase alpha 1B                                         | 1p21.1   | 1.0 ± 2.7                                          | 0.0<br>(0.0-9.0)    | 0.0<br>(0.0-10.2)    | 0.67             | 1.00           | 1.0 ± 2.8                                      | 56 | 0.0<br>(0.0-8.6)    | 32 | 0.0<br>(0.0-10.2)   | 24 | 0.44             | 1.00                               | [15,44]        |
| AMY2A  | 279                 | amylase alpha 2A                                         | 1p21.1   | 2.6 ± 4.1                                          | 0.0<br>(0.0-10.2)   | 0.0<br>(0.0-11.8)    | 0.41             | 1.00           | 2.4 ± 4.1                                      | 56 | 0.0<br>(0.0-10.2)   | 32 | 0.0<br>(0.0-11.8)   | 24 | 0.17             | 1.00                               | [15,44]        |
| AMY2B  | 280                 | amylase alpha 2B                                         | 1p21.1   | 12.6 ± 1.6                                         | 12.4<br>(10.1-16.2) | 13.0<br>(6.9-15.5)   | 0.23             | 1.00           | 12.7 ± 1.4                                     | 56 | 12.4<br>(10.1-16.2) | 32 | 13.2<br>(10.7-14.8) | 24 | <b>0.05</b>      | 1.00                               | [15,44]        |
| CALM1  | 801                 | calmodulin 1                                             | 14q32.11 | 19.9 ± 0.4                                         | 19.7<br>(18.9-20.6) | 20.2<br>(19.7-20.9)  | <b>0.00</b>      | <b>0.00</b>    | 19.9 ± 0.4                                     | 72 | 19.7<br>(18.9-20.6) | 36 | 20.2<br>(19.7-20.9) | 36 | <b>0.00</b>      | <b>0.00</b>                        | [16]           |
| CALM2  | 805                 | calmodulin 2                                             | 2p21     | 19.8 ± 0.5                                         | 19.5<br>(18.2-20.1) | 20.1<br>(18.5-21.1)  | <b>0.00</b>      | <b>0.00</b>    | 19.8 ± 0.5                                     | 67 | 19.5<br>(18.2-20.1) | 33 | 20.1<br>(18.5-20.6) | 34 | <b>0.00</b>      | <b>0.00</b>                        | [16]           |
| CALM3  | 808                 | calmodulin 3                                             | 19q13.32 | 21.7 ± 0.6                                         | 21.8<br>(20.8-22.9) | 21.6<br>(20.5-22.7)  | 0.12             | 1.00           | 21.7 ± 0.5                                     | 75 | 21.8<br>(20.8-22.9) | 36 | 21.6<br>(20.5-22.7) | 39 | 0.20             | 1.00                               | [16]           |
| G6PC   | 2538                | glucose-6-phosphatase catalytic subunit                  | 17q21.31 | 0.9 ± 2.5                                          | 0.0<br>(0.0-7.3)    | 0.0<br>(0.0-9.2)     | <b>0.02</b>      | 1.00           | 1.0 ± 2.5                                      | 62 | 0.0<br>(0.0-7.3)    | 28 | 0.0<br>(0.0-9.2)    | 34 | <b>0.05</b>      | 1.00                               | [16]           |

|        |        |                                                     |          |            |                     |                     |      |      |            |      |                     |      |                     |      |      |      |         |
|--------|--------|-----------------------------------------------------|----------|------------|---------------------|---------------------|------|------|------------|------|---------------------|------|---------------------|------|------|------|---------|
| G6PC2  | 57818  | glucose-6-phosphatase catalytic subunit 2           | 2q31.1   | 6.2 ± 4.9  | 7.3<br>(0.0-12.3)   | 9.2<br>(0.0-15.3)   | 0.02 | 1.00 | 6.3 ± 4.9  | 70   | 7.2<br>(0.0-12.3)   | 33   | 9.3<br>(0.0-15.3)   | 37   | 0.03 | 1.00 | [16]    |
| G6PC3  | 92579  | glucose-6-phosphatase catalytic subunit 3           | 17q21.31 | 20.3 ± 0.9 | 20.0<br>(18.5-21.7) | 20.7<br>(19.2-22.3) | 0.00 | 0.00 | 20.3 ± 0.9 | 62   | 19.8<br>(18.5-21.7) | 28   | 20.6<br>(19.2-22.0) | 34   | 0.00 | 0.02 | [16]    |
| GAA    | 2548   | glucosidase alpha, acid                             | 17q25.3  | 20.3 ± 0.7 | 20.1<br>(18.7-21.7) | 20.3<br>(19.4-22.0) | 0.02 | 1.00 | 20.1 ± 0.7 | 62   | 19.7<br>(18.7-21.7) | 28   | 20.3<br>(19.4-21.3) | 34   | 0.00 | 1.00 | [15,16] |
| GANC   | 2595   | glucosidase alpha, neutral C                        | 15q15.1  | 16.7 ± 0.5 | 16.6<br>(14.9-17.3) | 16.8<br>(15.3-17.8) | 0.16 | 1.00 | 16.7 ± 0.5 | 72   | 16.6<br>(15.4-17.3) | 37   | 16.8<br>(15.9-17.8) | 35   | 0.20 | 1.00 | [45]    |
| GCG    | 2641   | glucagon                                            | 2q24.2   | 0.4 ± 2.2  | 0.0<br>(0.0-16.3)   | 0.0<br>(0.0-7.3)    | 0.52 | 1.00 | 0.5 ± 2.3  | 70   | 0.0<br>(0.0-16.3)   | 33   | 0.0<br>(0.0-7.3)    | 37   | 0.47 | 1.00 | [46]    |
| GCGR   | 2642   | glucagon receptor                                   | 17q25.3  | 6.6 ± 4.9  | 7.3<br>(0.0-14.5)   | 9.5<br>(0.0-14.9)   | 0.02 | 1.00 | 6.3 ± 5.0  | 62   | 7.2<br>(0.0-12.8)   | 28   | 9.1<br>(0.0-14.9)   | 34   | 0.01 | 0.99 | [46]    |
| GCKR   | 2646   | glucokinase regulator                               | 2p23.3   | 1.3 ± 3.0  | 0.0<br>(0.0-10.1)   | 0.0<br>(0.0-9.7)    | 0.29 | 1.00 | 1.1 ± 2.8  | 67   | 0.0<br>(0.0-8.8)    | 33   | 0.0<br>(0.0-9.7)    | 34   | 0.02 | 1.00 | [16]    |
| GFPT1  | 2673   | glutamine--fructose-6-phosphate transaminase 1      | 2p13.3   | 17.0 ± 0.7 | 16.6<br>(15.5-17.4) | 17.4<br>(15.8-18.4) | 0.00 | 0.00 | 17.0 ± 0.7 | 67   | 16.6<br>(15.5-17.4) | 33   | 17.4<br>(15.8-18.4) | 34   | 0.00 | 0.00 | [34]    |
| GSK3A  | 2931   | glycogen synthase kinase 3 alpha                    | 19q13.2  | 19.3 ± 0.7 | 19.2<br>(18.2-21.3) | 19.2<br>(18.4-20.5) | 0.89 | 1.00 | 19.3 ± 0.7 | 75   | 19.2<br>(18.2-21.3) | 36   | 19.2<br>(18.4-20.5) | 39   | 0.77 | 1.00 | [23]    |
| GSK3B  | 2932   | glycogen synthase kinase 3 beta                     | 3q13.33  | 17.4 ± 0.3 | 17.6<br>(16.8-18.1) | 17.3<br>(16.2-17.8) | 0.00 | 0.00 | n.a.       | n.a. | n.a.                | n.a. | n.a.                | n.a. | n.a. | n.a. | [15,23] |
| INPP5K | 51763  | inositol polyphosphate-5-phosphatase K              | 17p13.3  | 19.2 ± 0.7 | 19.2<br>(18.0-21.0) | 19.1<br>(17.5-20.5) | 0.82 | 1.00 | 19.1 ± 0.7 | 68   | 19.2<br>(18.0-21.0) | 35   | 19.0<br>(18.0-20.3) | 33   | 0.62 | 1.00 | [47]    |
| NHLRC1 | 378884 | NHL containing ubiquitin ligase 1 repeat E3 protein | 6p22.3   | 17.1 ± 1.0 | 17.1<br>(10.0-19.0) | 17.4<br>(16.6-18.2) | 0.01 | 0.97 | 17.2 ± 0.5 | 36   | 16.7<br>(15.7-17.3) | 6    | 17.4<br>(16.6-17.8) | 30   | 0.01 | 0.82 | [40]    |
| NUDT14 | 256281 | nudix hydrolase 14                                  | 14q32.33 | 19.8 ± 1.0 | 19.4<br>(17.8-21.4) | 19.8<br>(18.8-21.9) | 0.01 | 0.94 | 19.8 ± 0.9 | 71   | 19.3<br>(17.9-21.4) | 35   | 19.8<br>(18.8-21.7) | 36   | 0.02 | 1.00 | [48]    |
| PCK1   | 5105   | phosphoenolpyruvate carboxykinase 1                 | 20q13.31 | 7.0 ± 3.8  | 6.9<br>(0.0-9.8)    | 9.4<br>(6.1-12.8)   | 0.00 | 0.00 | 6.8 ± 3.9  | 68   | 6.5<br>(0.0-9.8)    | 34   | 9.3<br>(6.1-12.8)   | 34   | 0.00 | 0.00 | [35]    |
| PFKM   | 5213   | phosphofructokinase, muscle                         | 12q13.11 | 19.4 ± 0.5 | 19.4<br>(17.9-20.2) | 19.5<br>(18.5-20.7) | 0.36 | 1.00 | 19.4 ± 0.4 | 72   | 19.4<br>(18.1-20.2) | 37   | 19.5<br>(18.5-20.2) | 35   | 0.57 | 1.00 | [49]    |
| PHKA1  | 5255   | phosphorylase kinase regulatory subunit alpha 1     | Xq13.1   | 14.9 ± 1.9 | 15.5<br>(10.9-17.8) | 14.6<br>(9.7-17.4)  | 0.05 | 1.00 | 14.9 ± 1.8 | 56   | 15.5<br>(10.9-17.8) | 29   | 14.6<br>(10.0-17.0) | 27   | 0.11 | 1.00 | [16]    |

|          |       |                                                        |          |            |                     |                     |      |      |            |    |                     |    |                     |    |      |      |         |
|----------|-------|--------------------------------------------------------|----------|------------|---------------------|---------------------|------|------|------------|----|---------------------|----|---------------------|----|------|------|---------|
| PHKA2    | 5256  | phosphorylase kinase regulatory subunit alpha 2        | Xp22.13  | 16.8 ± 0.6 | 17.1<br>(15.8-18.3) | 16.5<br>(15.3-17.9) | 0.00 | 0.00 | 16.8 ± 0.6 | 56 | 17.1<br>(15.8-18.3) | 29 | 16.5<br>(15.3-17.9) | 27 | 0.00 | 0.03 | [16]    |
| PHKB     | 5257  | phosphorylase kinase regulatory subunit beta           | 16q12.1  | 16.3 ± 0.8 | 16.0<br>(14.4-17.4) | 16.7<br>(15.3-18.1) | 0.00 | 0.03 | 16.4 ± 0.7 | 63 | 16.1<br>(14.7-17.4) | 33 | 16.9<br>(15.3-17.7) | 30 | 0.00 | 0.06 | [16]    |
| PHKG1    | 5260  | phosphorylase kinase catalytic subunit gamma 1         | 7p11.2   | 13.9 ± 0.8 | 13.8<br>(11.9-16.3) | 14.1<br>(12.8-15.5) | 0.06 | 1.00 | 13.9 ± 0.8 | 71 | 13.7<br>(11.9-16.3) | 36 | 14.1<br>(12.8-15.5) | 35 | 0.02 | 1.00 | [16]    |
| PHKG2    | 5261  | phosphorylase kinase catalytic subunit gamma 2         | 16p11.2  | 17.0 ± 0.6 | 16.9<br>(15.8-18.2) | 16.9<br>(16.2-17.9) | 0.84 | 1.00 | 17.0 ± 0.5 | 74 | 16.9<br>(15.8-18.2) | 37 | 16.9<br>(16.2-17.9) | 37 | 0.96 | 1.00 | [16]    |
| PPP1R14C | 81706 | protein phosphatase 1 regulatory inhibitor subunit 14C | 6q25.1   | 8.9 ± 5.2  | 7.9<br>(0.0-12.2)   | 12.6<br>(9.7-16.4)  | 0.00 | 0.00 | 9.1 ± 5.2  | 50 | 7.9<br>(0.0-12.2)   | 24 | 12.7<br>(9.7-16.4)  | 26 | 0.00 | 0.00 | [36]    |
| PRDM8    | 56978 | PR/SET domain 8                                        | 4q21.21  | 9.7 ± 3.4  | 9.1<br>(0.0-14.0)   | 10.9<br>(0.0-17.9)  | 0.00 | 0.06 | 9.8 ± 3.4  | 70 | 9.1<br>(0.0-14.0)   | 35 | 11.1<br>(0.0-17.9)  | 35 | 0.00 | 0.16 | [16,50] |
| PYGB     | 5834  | glycogen phosphorylase B                               | 20p11.21 | 21.7 ± 1.0 | 22.1<br>(20.1-24.6) | 21.3<br>(19.7-23.2) | 0.00 | 0.29 | 21.7 ± 1.0 | 67 | 22.1<br>(20.1-24.6) | 33 | 21.3<br>(20.2-23.0) | 34 | 0.00 | 0.19 | [15,16] |
| PYGL     | 5836  | glycogen phosphorylase L                               | 14q22.1  | 21.2 ± 1.3 | 21.6<br>(18.8-22.9) | 21.3<br>(16.8-23.7) | 0.48 | 1.00 | 21.2 ± 1.3 | 72 | 21.7<br>(18.8-22.9) | 36 | 21.4<br>(16.8-23.5) | 36 | 0.36 | 1.00 | [15,16] |
| PYGM     | 5837  | glycogen phosphorylase, muscle associated              | 11q13.1  | 13.2 ± 1.4 | 12.3<br>(10.2-15.1) | 13.9<br>(11.5-16.2) | 0.00 | 0.00 | 13.2 ± 1.3 | 66 | 12.2<br>(10.6-14.3) | 31 | 13.9<br>(11.5-16.0) | 35 | 0.00 | 0.00 | [15,16] |
| RBCK1    | 10616 | RANBP2-type and C3HC4-type zinc finger containing 1    | 20p13    | 20.0 ± 0.7 | 19.9<br>(18.9-21.8) | 19.7<br>(18.9-21.5) | 0.24 | 1.00 | 19.8 ± 0.6 | 67 | 19.8<br>(18.9-21.7) | 33 | 19.7<br>(18.9-20.7) | 34 | 0.29 | 1.00 | [51]    |
| TFEB     | 7942  | transcription factor EB                                | 6p21.1   | 15.3 ± 0.9 | 15.5<br>(13.2-17.3) | 15.2<br>(13.2-17.2) | 0.11 | 1.00 | 15.2 ± 0.7 | 36 | 15.7<br>(15.0-16.3) | 6  | 15.1<br>(13.9-17.2) | 30 | 0.04 | 1.00 | [52]    |
| UGDH     | 7358  | UDP-glucose 6-dehydrogenase                            | 6-4p14   | 16.8 ± 0.7 | 16.5<br>(15.1-18.2) | 16.8<br>(16.0-18.5) | 0.03 | 1.00 | 16.7 ± 0.6 | 68 | 16.5<br>(15.1-18.2) | 36 | 16.7<br>(16.0-17.9) | 32 | 0.21 | 1.00 | [53]    |

n= number; n.a.: not analyzed; NCBI: National Center for Biotechnology Information; TCGA: The Cancer Genome Atlas; SD: standard deviation; UM: Uveal melanoma. \*Genes that are involved in both the synthesis and degradation of glycogen.

P - values were determined by the Mann-Whitney U test. † Bonferroni correction.

Genes with a differential expression in monosomy-3-tumors that remained significant after Bonferroni correction were highlighted in colored background. References for gene function are presented in the main text.

**Table S2.** Genes with a lower expression level in the monosomy-3 tumors regardless of the gene copy number (n = 13),

#### Supplementary Table S2

Genes with a lower expression level in the monosomy-3 tumors regardless of the gene copy number (n=13) · Median expression (range) in log<sub>2</sub>(FPKM-ug) units



| Function*                     | #1-11. De novo glycogen synthesis & positive regulators of glycogen synthesis |                     |                     |                     |                     |                     |                     |                     |                    |                     |                     | #12,13. Negative regulators of glycogen synthesis |                     |
|-------------------------------|-------------------------------------------------------------------------------|---------------------|---------------------|---------------------|---------------------|---------------------|---------------------|---------------------|--------------------|---------------------|---------------------|---------------------------------------------------|---------------------|
| Gene symbol                   | ATG7                                                                          | BAP1                | EPM2A               | GBE1                | GYG1                | GYG2                | INSR                | IRS2                | IRS4               | PPP1R3B             | PPP1R3C             | GSK3B                                             | PHKA2               |
| Locus                         | 3p25.3                                                                        | 3p21.1              | 6q24.3              | 3p12.2              | 3q24                | Xp22.33             | 19p13.2             | 13q34               | Xq22.3             | 8p23.1              | 10q23.32            | 3q13.33                                           | Xp22.13             |
| Expression (n=80)             | 16.2<br>(14.9-17.2)                                                           | 19.5<br>(15.9-21.7) | 16.2<br>(14.5-17.7) | 16.7<br>(15.4-19.2) | 18.2<br>(17.5-19.2) | 20.8<br>(18.9-23.1) | 17.0<br>(16.2-17.9) | 19.0<br>(17.3-20.2) | 10.9<br>(0.0-15.7) | 17.3<br>(15.1-20.4) | 18.5<br>(15.0-21.4) | 17.4<br>(16.2-18.1)                               | 16.7<br>(15.3-18.3) |
| Age (n=80)                    | ATG7                                                                          | BAP1                | EPM2A               | GBE1                | GYG1                | GYG2                | INSR                | IRS2                | IRS4               | PPP1R3B             | PPP1R3C             | GSK3B                                             | PHKA2               |
| ≤Median (n=40)                | 16.2<br>(15.3-17.2)                                                           | 19.6<br>(16.1-21.0) | 16.2<br>(14.5-17.5) | 16.8<br>(15.4-19.2) | 18.2<br>(17.7-19.1) | 20.8<br>(19.0-23.1) | 17.0<br>(16.2-17.9) | 18.9<br>(17.3-20.1) | 11.3<br>(0.0-15.7) | 17.3<br>(15.1-20.4) | 18.8<br>(15.6-21.4) | 17.4<br>(16.2-18.1)                               | 16.9<br>(15.5-18.3) |
| >Median (n=40)                | 16.2<br>(14.9-17.1)                                                           | 19.4<br>(15.9-21.7) | 16.1<br>(14.6-17.7) | 16.6<br>(15.6-17.9) | 18.2<br>(17.5-19.2) | 20.9<br>(18.9-22.9) | 17.0<br>(16.2-17.7) | 19.0<br>(17.6-20.2) | 10.3<br>(0.0-15.3) | 17.2<br>(15.2-18.5) | 18.2<br>(15.0-21.3) | 17.4<br>(16.7-18.1)                               | 16.6<br>(15.3-17.9) |
| p - value <sup>†</sup>        | 0.46                                                                          | 0.89                | 0.80                | 0.19                | 0.72                | 0.91                | 0.66                | 0.79                | <b>0.03</b>        | 0.23                | 0.19                | 0.49                                              | 0.42                |
| Gender (n=80)                 | ATG7                                                                          | BAP1                | EPM2A               | GBE1                | GYG1                | GYG2                | INSR                | IRS2                | IRS4               | PPP1R3B             | PPP1R3C             | GSK3B                                             | PHKA2               |
| Female (n=35)                 | 16.1<br>(14.9-17.1)                                                           | 19.6<br>(16.1-21.3) | 16.2<br>(15.0-17.7) | 16.7<br>(15.4-17.7) | 18.2<br>(17.5-19.2) | 21.3<br>(19.4-23.1) | 17.0<br>(16.2-17.9) | 19.1<br>(17.3-20.2) | 10.7<br>(0.0-15.0) | 17.5<br>(15.4-19.1) | 18.6<br>(15.6-21.4) | 17.4<br>(16.2-18.1)                               | 16.7<br>(16.1-18.0) |
| Male (n=45)                   | 16.3<br>(15.5-17.2)                                                           | 19.3<br>(15.9-21.7) | 16.1<br>(14.5-17.6) | 16.8<br>(15.6-19.2) | 18.3<br>(17.6-19.1) | 20.6<br>(18.9-22.0) | 16.9<br>(16.2-17.7) | 18.9<br>(17.6-20.2) | 10.9<br>(0.0-15.7) | 17.1<br>(15.1-20.4) | 18.4<br>(15.0-21.3) | 17.4<br>(16.7-18.0)                               | 16.7<br>(15.3-18.3) |
| p - value <sup>†</sup>        | 0.18                                                                          | 0.83                | 0.31                | 0.87                | 0.26                | <b>0.00</b>         | 0.92                | 0.39                | 0.77               | 0.21                | 0.40                | 0.87                                              | 0.66                |
| Eye color (n=30)              | ATG7                                                                          | BAP1                | EPM2A               | GBE1                | GYG1                | GYG2                | INSR                | IRS2                | IRS4               | PPP1R3B             | PPP1R3C             | GSK3B                                             | PHKA2               |
| Brown (n=15)                  | 16.3<br>(15.3-17.2)                                                           | 19.8<br>(16.6-21.7) | 16.3<br>(14.5-17.0) | 16.7<br>(15.7-17.6) | 18.2<br>(17.7-19.1) | 21.0<br>(19.4-23.1) | 17.0<br>(16.2-17.9) | 19.1<br>(17.3-20.2) | 11.3<br>(8.2-14.3) | 17.2<br>(15.4-19.1) | 18.5<br>(15.6-20.8) | 17.3<br>(16.8-18.1)                               | 17.0<br>(16.2-18.0) |
| Green (n=6)                   | 16.2<br>(15.6-16.5)                                                           | 19.1<br>(16.4-20.0) | 15.7<br>(14.9-17.2) | 16.6<br>(15.9-17.7) | 18.3<br>(17.9-18.9) | 20.6<br>(19.0-21.3) | 16.9<br>(16.3-17.2) | 19.2<br>(18.0-19.6) | 9.9<br>(0.0-14.6)  | 16.3<br>(15.2-20.0) | 17.7<br>(16.9-19.7) | 17.5<br>(17.0-18.0)                               | 16.9<br>(15.8-17.5) |
| Blue (n=9)                    | 16.3<br>(15.6-17.1)                                                           | 19.8<br>(16.2-21.3) | 15.9<br>(15.0-17.4) | 16.9<br>(16.1-17.7) | 18.2<br>(18.0-18.5) | 21.3<br>(19.5-22.9) | 17.0<br>(16.4-17.4) | 19.0<br>(18.4-20.0) | 10.9<br>(9.2-14.9) | 17.5<br>(15.4-18.8) | 18.2<br>(17.5-20.9) | 17.3<br>(16.9-17.9)                               | 16.9<br>(16.1-17.6) |
| p - value <sup>††</sup>       | 0.54                                                                          | 0.58                | 0.57                | 0.90                | 0.92                | 0.21                | 0.85                | 0.94                | 0.39               | 0.68                | 0.48                | 0.82                                              | 0.76                |
| Largest Basal Diameter (n=74) | ATG7                                                                          | BAP1                | EPM2A               | GBE1                | GYG1                | GYG2                | INSR                | IRS2                | IRS4               | PPP1R3B             | PPP1R3C             | GSK3B                                             | PHKA2               |
| ≤13 mm (n=12)                 | 16.3<br>(15.6-17.2)                                                           | 20.0<br>(19.0-21.3) | 16.9<br>(14.9-17.7) | 16.9<br>(15.4-17.6) | 18.5<br>(17.9-19.0) | 21.7<br>(19.0-22.7) | 17.1<br>(16.3-17.5) | 19.1<br>(18.0-19.6) | 11.5<br>(8.2-15.0) | 17.5<br>(15.7-18.7) | 19.5<br>(16.9-20.9) | 17.5<br>(16.2-17.8)                               | 17.1<br>(15.8-17.5) |
| >13 mm (n=62)                 | 16.2<br>(14.9-17.1)                                                           | 19.0<br>(15.9-21.7) | 16.1<br>(14.5-17.6) | 16.7<br>(15.6-19.2) | 18.2<br>(17.5-19.2) | 20.7<br>(18.9-23.1) | 17.0<br>(16.2-17.9) | 18.9<br>(17.3-20.2) | 10.7<br>(0.0-15.7) | 17.1<br>(15.2-20.0) | 18.3<br>(15.0-21.4) | 17.3<br>(16.7-18.1)                               | 16.6<br>(15.3-18.3) |
| p - value <sup>†</sup>        | 0.17                                                                          | <b>0.00</b>         | <b>0.03</b>         | 0.26                | <b>&lt;0.05</b>     | <b>0.00</b>         | 0.73                | 0.58                | 0.34               | 0.31                | <b>0.02</b>         | 0.84                                              | 0.25                |
| Tumor thickness (n=76)        | ATG7                                                                          | BAP1                | EPM2A               | GBE1                | GYG1                | GYG2                | INSR                | IRS2                | IRS4               | PPP1R3B             | PPP1R3C             | GSK3B                                             | PHKA2               |
| < Median (n=37)               | 16.1<br>(14.9-17.1)                                                           | 19.6<br>(16.3-21.3) | 16.3<br>(14.5-17.7) | 16.8<br>(15.4-17.9) | 18.3<br>(17.5-19.2) | 21.0<br>(19.0-22.7) | 17.1<br>(16.2-17.7) | 19.1<br>(17.3-20.1) | 10.7<br>(0.0-15.3) | 17.3<br>(15.3-18.8) | 18.7<br>(15.0-21.3) | 17.3<br>(16.2-18.1)                               | 16.7<br>(15.3-17.8) |
| ≥ Median (n=39)               | 16.3<br>(15.3-17.2)                                                           | 19.3<br>(15.9-21.7) | 15.9<br>(14.6-17.5) | 16.7<br>(15.6-19.2) | 18.2<br>(17.6-19.1) | 20.7<br>(18.9-23.1) | 17.0<br>(16.3-17.9) | 19.0<br>(17.9-20.2) | 10.9<br>(0.0-15.7) | 17.2<br>(15.2-20.0) | 18.2<br>(15.6-21.4) | 17.4<br>(16.7-18.1)                               | 16.6<br>(15.8-18.3) |
| p - value <sup>†</sup>        | 0.83                                                                          | 0.98                | <b>0.03</b>         | 0.76                | 0.21                | 0.16                | 0.48                | 0.82                | 0.51               | 0.92                | <b>0.06</b>         | 0.65                                              | 0.34                |

| AJCC Stage, clinical (n=80)           | ATG7                | BAP1                | EPM2A               | GBE1                | GYG1                | GYG2                | INSR                | IRS2                | IRS4               | PPP1R3B             | PPP1R3C             | GSK3B               | PHKA2               |
|---------------------------------------|---------------------|---------------------|---------------------|---------------------|---------------------|---------------------|---------------------|---------------------|--------------------|---------------------|---------------------|---------------------|---------------------|
| Stage IIA and -B (n=36)               | 16.2<br>(14.9-17.0) | 19.7<br>(15.9-20.9) | 16.7<br>(14.8-17.7) | 16.9<br>(15.4-17.9) | 18.3<br>(17.5-19.2) | 21.1<br>(18.9-22.9) | 17.1<br>(16.3-17.7) | 19.1<br>(17.3-20.1) | 11.6<br>(0.0-15.3) | 17.6<br>(15.1-19.1) | 19.4<br>(15.0-21.4) | 17.5<br>(16.2-18.1) | 16.9<br>(15.3-17.8) |
| Stage IIIA-C (n=40)                   | 16.3<br>(15.3-17.2) | 19.0<br>(16.1-21.7) | 16.1<br>(14.5-17.5) | 16.7<br>(15.7-19.2) | 18.2<br>(17.6-19.1) | 20.6<br>(19.0-23.1) | 17.0<br>(16.2-17.9) | 19.0<br>(17.9-20.2) | 10.6<br>(0.0-15.7) | 16.9<br>(15.2-20.4) | 18.1<br>(15.6-21.1) | 17.3<br>(16.7-18.0) | 16.6<br>(15.8-18.3) |
| Stage IV (n=4)                        | 16.0<br>(15.6-16.6) | 18.8<br>(17.5-19.5) | 15.5<br>(15.0-16.2) | 16.6<br>(16.1-16.9) | 18.4<br>(18.0-19.0) | 20.3<br>(19.7-21.3) | 16.6<br>(16.4-16.8) | 18.6<br>(18.5-18.8) | 10.5<br>(0.0-11.1) | 15.8<br>(15.4-17.3) | 17.3<br>(16.7-18.2) | 17.4<br>(16.9-18.0) | 16.3<br>(16.2-16.5) |
| <i>p</i> - value <sup>††</sup>        | 0.54                | 0.14                | <b>0.00</b>         | 0.36                | 0.13                | 0.15                | 0.20                | 0.22                | 0.18               | <b>0.04</b>         | <b>0.01</b>         | 0.31                | <b>0.09</b>         |
| Extrascleral Extension (n=80)         | ATG7                | BAP1                | EPM2A               | GBE1                | GYG1                | GYG2                | INSR                | IRS2                | IRS4               | PPP1R3B             | PPP1R3C             | GSK3B               | PHKA2               |
| No (n=71)                             | 16.2<br>(14.9-17.2) | 19.6<br>(16.1-21.7) | 16.2<br>(14.5-17.7) | 16.8<br>(15.4-19.2) | 18.2<br>(17.5-19.2) | 20.9<br>(18.9-23.1) | 17.0<br>(16.2-17.9) | 19.1<br>(17.3-20.2) | 10.9<br>(0.0-15.7) | 17.4<br>(15.1-20.4) | 18.6<br>(15.0-21.4) | 17.4<br>(16.2-18.1) | 16.8<br>(15.3-18.3) |
| Yes (n=9)                             | 16.1<br>(15.5-16.7) | 17.7<br>(15.9-20.3) | 15.3<br>(14.8-16.6) | 16.7<br>(16.1-17.5) | 18.2<br>(17.7-19.0) | 20.7<br>(19.0-21.3) | 16.6<br>(16.2-17.3) | 18.6<br>(18.0-19.5) | 10.2<br>(0.0-13.1) | 16.0<br>(15.4-17.9) | 17.3<br>(16.1-20.0) | 17.3<br>(16.9-18.0) | 16.5<br>(15.8-16.7) |
| <i>p</i> - value <sup>†</sup>         | 0.44                | 0.10                | <b>0.02</b>         | 0.65                | 0.90                | 0.16                | <b>0.04</b>         | 0.11                | <b>0.04</b>        | <b>0.01</b>         | <b>0.02</b>         | 0.99                | <b>0.01</b>         |
| BAP1 expression (n=80)                | ATG7                | BAP1                | EPM2A               | GBE1                | GYG1                | GYG2                | INSR                | IRS2                | IRS4               | PPP1R3B             | PPP1R3C             | GSK3B               | PHKA2               |
| >Median (n=40)                        | 16.4<br>(15.8-17.2) | 20.1<br>(19.5-21.7) | 16.6<br>(15.1-17.7) | 17.2<br>(15.4-19.2) | 18.4<br>(17.7-19.2) | 21.3<br>(20.2-23.1) | 17.1<br>(16.3-17.9) | 19.2<br>(18.5-20.2) | 13.2<br>(0.0-15.3) | 18.0<br>(15.4-20.4) | 19.5<br>(16.7-21.4) | 17.6<br>(16.2-18.1) | 17.1<br>(16.1-18.3) |
| ≤Median (n=40)                        | 16.0<br>(14.9-17.0) | 17.8<br>(15.9-19.5) | 16.0<br>(14.5-17.5) | 16.5<br>(15.6-17.6) | 18.2<br>(17.5-18.7) | 20.1<br>(18.9-21.9) | 16.7<br>(16.2-17.7) | 18.7<br>(17.3-19.7) | 10.2<br>(0.0-15.7) | 16.4<br>(15.1-18.3) | 17.6<br>(15.0-21.1) | 17.3<br>(16.7-17.9) | 16.4<br>(15.3-17.5) |
| <i>p</i> - value <sup>†</sup>         | <b>0.00</b>         | <b>0.00</b>         | <b>0.00</b>         | <b>0.00</b>         | <b>0.00</b>         | <b>0.00</b>         | <b>0.00</b>         | <b>0.00</b>         | <b>0.00</b>        | <b>0.00</b>         | <b>0.00</b>         | <b>0.00</b>         | <b>0.00</b>         |
| Morphology (n=80)                     | ATG7                | BAP1                | EPM2A               | GBE1                | GYG1                | GYG2                | INSR                | IRS2                | IRS4               | PPP1R3B             | PPP1R3C             | GSK3B               | PHKA2               |
| Spindle (n=43)                        | 16.3<br>(14.9-17.2) | 19.8<br>(16.1-21.7) | 16.5<br>(15.0-17.5) | 16.9<br>(15.4-19.2) | 18.3<br>(17.5-19.2) | 21.3<br>(19.4-23.1) | 17.1<br>(16.3-17.9) | 19.1<br>(17.9-20.2) | 11.2<br>(0.0-15.7) | 17.7<br>(15.4-20.4) | 19.4<br>(16.6-21.3) | 17.5<br>(16.2-18.1) | 17.1<br>(16.1-18.3) |
| Mixed / Spindle (n=14)                | 16.3<br>(15.8-16.6) | 18.8<br>(15.9-21.0) | 15.8<br>(14.8-17.7) | 16.5<br>(15.9-17.7) | 18.2<br>(17.6-18.6) | 20.8<br>(19.0-21.8) | 17.0<br>(16.4-17.3) | 19.1<br>(18.3-20.2) | 10.6<br>(0.0-14.6) | 17.2<br>(15.7-20.0) | 18.0<br>(16.1-20.2) | 17.3<br>(16.7-18.0) | 16.6<br>(16.3-17.9) |
| Mixed / Epithelioid (n=7)             | 16.0<br>(15.8-17.0) | 17.4<br>(16.3-19.9) | 15.7<br>(14.5-17.6) | 16.2<br>(15.7-17.9) | 18.2<br>(18.0-18.7) | 20.1<br>(19.5-21.0) | 16.6<br>(16.2-17.1) | 18.6<br>(18.1-19.2) | 10.5<br>(0.0-15.3) | 16.1<br>(15.2-18.5) | 17.9<br>(17.0-19.9) | 17.3<br>(17.2-17.8) | 16.4<br>(16.0-16.6) |
| Epithelioid (n=16)                    | 15.9<br>(15.5-16.7) | 17.9<br>(16.3-19.9) | 15.9<br>(14.7-17.2) | 16.7<br>(15.6-17.5) | 18.1<br>(17.6-18.7) | 19.8<br>(18.9-21.0) | 16.6<br>(16.2-17.3) | 18.5<br>(17.3-19.4) | 10.6<br>(0.0-14.4) | 16.2<br>(15.1-17.9) | 17.1<br>(15.0-21.4) | 17.4<br>(16.8-17.8) | 16.1<br>(15.3-16.8) |
| <i>p</i> - value <sup>††</sup>        | <b>0.01</b>         | <b>0.00</b>         | <b>0.00</b>         | 0.10                | <b>0.06</b>         | <b>0.00</b>         | <b>0.00</b>         | <b>0.00</b>         | 0.32               | <b>0.00</b>         | <b>0.00</b>         | 0.48                | <b>0.00</b>         |
| Closed connective tissue loops (n=80) | ATG7                | BAP1                | EPM2A               | GBE1                | GYG1                | GYG2                | INSR                | IRS2                | IRS4               | PPP1R3B             | PPP1R3C             | GSK3B               | PHKA2               |
| Absent (n=38)                         | 16.4<br>(15.3-17.2) | 19.8<br>(15.9-21.7) | 16.3<br>(14.8-17.6) | 16.9<br>(15.4-19.2) | 18.3<br>(17.7-19.2) | 21.0<br>(18.9-22.9) | 17.1<br>(16.3-17.7) | 19.1<br>(17.6-20.2) | 11.9<br>(0.0-15.3) | 17.8<br>(15.6-20.4) | 19.4<br>(15.0-21.3) | 17.5<br>(16.2-18.1) | 17.0<br>(15.3-18.3) |
| Present (n=42)                        | 16.1<br>(14.9-17.0) | 18.8<br>(16.1-20.8) | 16.1<br>(14.5-17.7) | 16.7<br>(15.6-17.9) | 18.2<br>(17.5-19.1) | 20.6<br>(19.0-23.1) | 16.8<br>(16.2-17.9) | 18.9<br>(17.3-20.2) | 10.4<br>(0.0-15.7) | 16.6<br>(15.1-18.9) | 18.1<br>(15.9-21.4) | 17.3<br>(16.7-18.0) | 16.6<br>(15.5-18.0) |
| <i>p</i> - value <sup>†</sup>         | <b>0.01</b>         | <b>0.00</b>         | 0.34                | 0.23                | <b>0.04</b>         | <b>0.06</b>         | <b>0.03</b>         | 0.22                | <b>0.00</b>        | <b>0.00</b>         | <b>0.02</b>         | 0.17                | <b>0.07</b>         |
| Mitotic count (n=80)                  | ATG7                | BAP1                | EPM2A               | GBE1                | GYG1                | GYG2                | INSR                | IRS2                | IRS4               | PPP1R3B             | PPP1R3C             | GSK3B               | PHKA2               |
| 0-5 (n=63)                            | 16.3<br>(14.9-17.2) | 19.6<br>(15.9-21.7) | 16.3<br>(14.5-17.7) | 16.7<br>(15.4-19.2) | 18.3<br>(17.5-19.2) | 20.9<br>(18.9-23.1) | 17.0<br>(16.2-17.9) | 19.0<br>(17.3-20.2) | 10.9<br>(0.0-15.7) | 17.5<br>(15.1-20.4) | 18.8<br>(15.0-21.4) | 17.4<br>(16.2-18.1) | 16.8<br>(15.3-18.3) |



|                                               |                     |                     |                     |                     |                     |                     |                     |                     |                    |                     |                     |                     |                     |
|-----------------------------------------------|---------------------|---------------------|---------------------|---------------------|---------------------|---------------------|---------------------|---------------------|--------------------|---------------------|---------------------|---------------------|---------------------|
| >5-10 (n=11)                                  | 16.1<br>(15.6-16.4) | 19.3<br>(17.5-20.3) | 16.1<br>(15.0-17.2) | 16.8<br>(16.1-17.7) | 18.0<br>(17.6-18.5) | 21.0<br>(19.0-22.6) | 16.8<br>(16.4-17.3) | 19.1<br>(18.5-20.2) | 10.9<br>(8.1-14.3) | 16.7<br>(15.4-18.8) | 18.0<br>(16.9-20.3) | 17.6<br>(16.9-17.9) | 16.5<br>(16.1-17.9) |
| >11 (n=6)                                     | 16.1<br>(15.6-16.5) | 18.9<br>(16.3-19.8) | 16.0<br>(14.6-16.5) | 16.6<br>(15.9-17.9) | 18.3<br>(17.9-18.7) | 20.0<br>(19.4-20.5) | 16.7<br>(16.3-17.3) | 18.5<br>(18.1-19.4) | 10.7<br>(0.0-13.0) | 16.1<br>(15.6-17.6) | 17.4<br>(15.6-18.9) | 17.3<br>(16.9-17.6) | 16.5<br>(16.0-17.2) |
| <i>p</i> - value <sup>††</sup>                | 0.11                | 0.34                | 0.23                | 0.82                | <b>0.05</b>         | <b>0.03</b>         | 0.42                | 0.24                | 0.54               | <b>0.06</b>         | <b>0.04</b>         | 0.48                | 0.40                |
| Tumor infiltrating lymphocytes density (n=80) | ATG7                | BAP1                | EPM2A               | GBE1                | GYG1                | GYG2                | INSR                | IRS2                | IRS4               | PPP1R3B             | PPP1R3C             | GSK3B               | PHKA2               |
| Mild (n=71)                                   | 16.3<br>(14.9-17.2) | 19.6<br>(16.1-21.7) | 16.2<br>(14.5-17.7) | 16.8<br>(15.7-19.2) | 18.3<br>(17.5-19.2) | 20.9<br>(18.9-23.1) | 17.0<br>(16.2-17.9) | 19.1<br>(17.3-20.2) | 10.9<br>(0.0-15.7) | 17.4<br>(15.2-20.4) | 18.7<br>(15.6-21.4) | 17.5<br>(16.7-18.1) | 16.8<br>(15.8-18.3) |
| Moderate (n=7)                                | 16.0<br>(15.5-16.7) | 17.5<br>(16.3-19.9) | 15.9<br>(14.7-16.6) | 16.4<br>(15.4-17.5) | 18.1<br>(17.7-18.7) | 19.8<br>(19.0-22.2) | 16.6<br>(16.2-17.5) | 18.6<br>(17.6-19.1) | 9.2<br>(0.0-13.1)  | 16.1<br>(15.1-17.9) | 17.3<br>(15.0-18.4) | 17.2<br>(16.2-17.8) | 16.1<br>(15.3-16.7) |
| Heavy (n=2)                                   | 16.1<br>(15.8-16.4) | 17.5<br>(15.9-19.0) | 15.4<br>(14.8-15.9) | 15.9<br>(15.6-16.2) | 18.0<br>(17.9-18.2) | 19.9<br>(19.4-20.4) | 16.7<br>(16.5-16.8) | 18.7<br>(18.5-18.8) | 10.1<br>(9.4-10.9) | 16.0<br>(16.0-16.1) | 16.0<br>(15.9-16.1) | 16.9<br>(16.8-17.1) | 16.0<br>(15.8-16.3) |
| <i>p</i> - value <sup>††</sup>                | 0.22                | <b>0.06</b>         | <b>0.05</b>         | <b>0.03</b>         | 0.17                | 0.11                | 0.24                | <b>0.03</b>         | <b>0.07</b>        | <b>0.02</b>         | <b>0.00</b>         | <b>0.06</b>         | <b>0.00</b>         |
| Tumor infiltrating macrophages density (n=80) | ATG7                | BAP1                | EPM2A               | GBE1                | GYG1                | GYG2                | INSR                | IRS2                | IRS4               | PPP1R3B             | PPP1R3C             | GSK3B               | PHKA2               |
| Mild (n=40)                                   | 16.1<br>(15.3-17.1) | 19.6<br>(16.1-21.3) | 16.4<br>(15.0-17.7) | 16.9<br>(15.9-19.2) | 18.3<br>(17.6-19.2) | 21.0<br>(19.0-22.7) | 17.1<br>(16.4-17.7) | 19.1<br>(17.9-20.1) | 11.2<br>(0.0-15.7) | 17.6<br>(15.4-20.4) | 19.4<br>(16.6-21.4) | 17.6<br>(16.7-18.1) | 16.9<br>(16.1-18.3) |
| Moderate (n=29)                               | 16.2<br>(14.9-17.1) | 19.0<br>(15.9-21.7) | 16.0<br>(14.6-17.4) | 16.6<br>(15.9-17.7) | 18.2<br>(17.5-19.1) | 20.6<br>(18.9-23.1) | 16.8<br>(16.2-17.9) | 18.9<br>(17.6-20.2) | 10.6<br>(0.0-14.6) | 16.8<br>(15.1-18.9) | 18.0<br>(15.0-21.1) | 17.3<br>(16.8-17.9) | 16.6<br>(15.3-18.0) |
| Heavy (n=11)                                  | 16.3<br>(15.8-17.2) | 19.0<br>(16.6-21.0) | 15.9<br>(14.5-17.0) | 16.6<br>(15.4-17.1) | 18.2<br>(17.9-18.4) | 20.7<br>(19.4-22.9) | 16.6<br>(16.2-17.5) | 18.8<br>(17.3-20.0) | 10.5<br>(8.2-14.6) | 16.8<br>(15.2-19.1) | 17.8<br>(15.9-19.6) | 17.3<br>(16.2-18.1) | 16.5<br>(15.8-17.5) |
| <i>p</i> - value <sup>††</sup>                | 0.29                | 0.39                | <b>0.00</b>         | <b>0.00</b>         | <b>0.08</b>         | 0.39                | 0.12                | 0.43                | <b>&lt;0.05</b>    | <b>0.03</b>         | <b>0.00</b>         | <b>0.02</b>         | 0.49                |
| Pigmentation (n=80)                           | ATG7                | BAP1                | EPM2A               | GBE1                | GYG1                | GYG2                | INSR                | IRS2                | IRS4               | PPP1R3B             | PPP1R3C             | GSK3B               | PHKA2               |
| Mild (n=39)                                   | 16.1<br>(14.9-17.1) | 19.6<br>(16.1-21.3) | 16.5<br>(15.3-17.7) | 17.0<br>(16.1-19.2) | 18.3<br>(17.5-19.2) | 20.9<br>(18.9-22.7) | 17.1<br>(16.3-17.7) | 19.1<br>(17.9-20.1) | 11.4<br>(0.0-15.7) | 17.6<br>(15.6-20.4) | 19.3<br>(15.9-21.4) | 17.6<br>(16.7-18.1) | 17.0<br>(16.1-18.3) |
| Moderate (n=27)                               | 16.2<br>(15.5-17.2) | 19.0<br>(16.2-21.7) | 15.9<br>(14.6-16.9) | 16.6<br>(15.6-17.6) | 18.2<br>(17.7-19.0) | 20.7<br>(19.0-23.1) | 16.8<br>(16.2-17.9) | 18.8<br>(17.3-20.2) | 10.3<br>(0.0-14.6) | 16.6<br>(15.1-18.9) | 17.8<br>(15.0-20.8) | 17.3<br>(16.8-18.0) | 16.6<br>(15.3-18.0) |
| Heavy (n=14)                                  | 16.4<br>(15.7-17.0) | 19.2<br>(15.9-20.9) | 15.8<br>(14.5-17.2) | 16.5<br>(15.4-17.2) | 18.2<br>(17.9-18.9) | 20.6<br>(19.4-22.9) | 16.6<br>(16.2-17.7) | 19.1<br>(18.3-20.0) | 10.1<br>(0.0-13.5) | 16.9<br>(15.2-19.1) | 18.5<br>(15.6-20.1) | 17.3<br>(16.2-18.1) | 16.5<br>(15.8-17.2) |
| <i>p</i> - value <sup>††</sup>                | 0.34                | 0.67                | <b>0.00</b>         | <b>0.00</b>         | 0.43                | 0.72                | 0.11                | 0.28                | <b>0.00</b>        | <b>0.01</b>         | <b>0.00</b>         | <b>0.04</b>         | <b>0.08</b>         |
| Necrosis (n=80)                               | ATG7                | BAP1                | EPM2A               | GBE1                | GYG1                | GYG2                | INSR                | IRS2                | IRS4               | PPP1R3B             | PPP1R3C             | GSK3B               | PHKA2               |
| Absent (n=63)                                 | 16.2<br>(15.3-17.2) | 19.6<br>(16.1-21.7) | 16.2<br>(14.5-17.7) | 16.8<br>(15.4-17.9) | 18.3<br>(17.5-19.2) | 20.9<br>(19.0-23.1) | 17.0<br>(16.2-17.9) | 19.1<br>(17.6-20.2) | 10.9<br>(0.0-15.7) | 17.3<br>(15.1-20.4) | 18.8<br>(15.0-21.4) | 17.4<br>(16.2-18.1) | 16.8<br>(15.3-18.0) |
| Present (n=17)                                | 16.2<br>(14.9-16.8) | 19.3<br>(15.9-21.0) | 15.9<br>(14.6-17.2) | 16.7<br>(16.1-19.2) | 18.2<br>(17.6-19.0) | 20.7<br>(18.9-22.9) | 16.8<br>(16.2-17.6) | 18.7<br>(17.3-20.2) | 10.9<br>(0.0-14.6) | 16.8<br>(15.4-18.6) | 17.7<br>(15.9-20.6) | 17.4<br>(16.9-18.0) | 16.5<br>(16.0-18.3) |
| <i>p</i> - value <sup>†</sup>                 | 0.72                | 0.69                | <b>0.09</b>         | 0.60                | 0.21                | 0.27                | 0.45                | 0.40                | 0.12               | 0.51                | <b>0.00</b>         | 0.86                | 0.14                |
| Body-Mass-Index (n=53)                        | ATG7                | BAP1                | EPM2A               | GBE1                | GYG1                | GYG2                | INSR                | IRS2                | IRS4               | PPP1R3B             | PPP1R3C             | GSK3B               | PHKA2               |
| <25.0 (n=17)                                  | 16.2<br>(14.9-16.9) | 19.6<br>(16.2-20.9) | 16.4<br>(15.3-17.4) | 16.9<br>(15.6-17.7) | 18.2<br>(17.6-18.9) | 20.9<br>(19.4-23.1) | 17.2<br>(16.5-17.9) | 19.1<br>(17.3-20.2) | 11.4<br>(0.0-14.9) | 17.7<br>(15.2-19.1) | 19.0<br>(15.9-21.4) | 17.5<br>(16.8-18.1) | 16.9<br>(15.8-18.0) |

|                                          |                     |                     |                     |                     |                     |                     |                     |                     |                    |                     |                     |                     |                     |
|------------------------------------------|---------------------|---------------------|---------------------|---------------------|---------------------|---------------------|---------------------|---------------------|--------------------|---------------------|---------------------|---------------------|---------------------|
| ≥25.0 (n=36)                             | 16.2<br>(15.3-17.2) | 19.4<br>(16.1-21.7) | 16.0<br>(14.5-17.6) | 16.7<br>(15.4-17.9) | 18.3<br>(17.7-19.1) | 20.8<br>(18.9-22.7) | 16.9<br>(16.2-17.7) | 18.9<br>(17.9-20.2) | 10.8<br>(0.0-15.3) | 17.1<br>(15.3-20.4) | 18.3<br>(15.6-20.4) | 17.4<br>(16.2-18.0) | 16.5<br>(15.8-17.6) |
| <i>p</i> - value <sup>†</sup>            | 0.82                | 0.47                | <b>0.08</b>         | 0.32                | 0.20                | 0.27                | 0.12                | <b>&lt;0.05</b>     | 0.47               | 0.65                | 0.80                | 0.67                | 0.14                |
| Progression (n=80)                       | ATG7                | BAP1                | EPM2A               | GBE1                | GYG1                | GYG2                | INSR                | IRS2                | IRS4               | PPP1R3B             | PPP1R3C             | GSK3B               | PHKA2               |
| Censored (n=50)                          | 16.3<br>(15.5-17.2) | 19.8<br>(16.1-21.7) | 16.4<br>(14.6-17.7) | 16.9<br>(15.4-19.2) | 18.3<br>(17.5-19.2) | 21.1<br>(19.4-23.1) | 17.1<br>(16.3-17.9) | 19.1<br>(17.3-20.2) | 11.3<br>(0.0-15.7) | 17.6<br>(15.6-20.4) | 19.1<br>(15.0-21.4) | 17.5<br>(16.2-18.1) | 17.0<br>(15.3-18.3) |
| Progression (n=30)                       | 16.0<br>(14.9-17.0) | 18.0<br>(15.9-20.6) | 15.6<br>(14.5-17.4) | 16.6<br>(15.7-17.7) | 18.1<br>(17.7-19.0) | 20.2<br>(18.9-22.6) | 16.7<br>(16.2-17.4) | 18.7<br>(17.9-20.1) | 10.5<br>(0.0-15.0) | 16.4<br>(15.1-18.8) | 17.3<br>(15.6-20.4) | 17.4<br>(16.8-18.0) | 16.5<br>(15.5-17.8) |
| <i>p</i> - value <sup>†</sup>            | <b>0.01</b>         | <b>0.00</b>         | <b>0.00</b>         | <b>0.02</b>         | <b>0.01</b>         | <b>0.00</b>         | <b>0.00</b>         | <b>0.00</b>         | <b>0.09</b>        | <b>0.00</b>         | <b>0.00</b>         | 0.55                | <b>0.00</b>         |
| Metastases (n=80)                        | ATG7                | BAP1                | EPM2A               | GBE1                | GYG1                | GYG2                | INSR                | IRS2                | IRS4               | PPP1R3B             | PPP1R3C             | GSK3B               | PHKA2               |
| No (n=54)                                | 16.3<br>(15.5-17.2) | 19.8<br>(16.1-21.7) | 16.4<br>(14.6-17.7) | 16.9<br>(15.4-19.2) | 18.3<br>(17.5-19.2) | 21.1<br>(19.0-23.1) | 17.1<br>(16.2-17.9) | 19.1<br>(17.3-20.2) | 11.7<br>(0.0-15.7) | 17.6<br>(15.6-20.4) | 19.2<br>(15.0-21.4) | 17.5<br>(16.2-18.1) | 17.0<br>(15.3-18.3) |
| Yes (n=26)                               | 16.0<br>(14.9-17.0) | 17.9<br>(15.9-20.3) | 15.6<br>(14.5-16.9) | 16.5<br>(15.7-17.7) | 18.1<br>(17.7-19.0) | 19.9<br>(18.9-22.6) | 16.6<br>(16.2-17.7) | 18.7<br>(17.9-20.1) | 10.5<br>(0.0-14.3) | 16.3<br>(15.1-18.8) | 17.3<br>(15.6-20.3) | 17.3<br>(16.8-18.0) | 16.3<br>(15.5-17.6) |
| <i>p</i> - value <sup>†</sup>            | <b>0.01</b>         | <b>0.00</b>         | <b>0.00</b>         | <b>0.00</b>         | <b>0.02</b>         | <b>0.00</b>         | <b>0.00</b>         | <b>0.00</b>         | <b>0.02</b>        | <b>0.00</b>         | <b>0.00</b>         | 0.15                | <b>0.00</b>         |
| Disease specific survival (n=78)         | ATG7                | BAP1                | EPM2A               | GBE1                | GYG1                | GYG2                | INSR                | IRS2                | IRS4               | PPP1R3B             | PPP1R3C             | GSK3B               | PHKA2               |
| Alive or dead due to other causes (n=58) | 16.3<br>(15.3-17.2) | 19.8<br>(16.1-21.7) | 16.4<br>(14.6-17.7) | 16.9<br>(15.4-19.2) | 18.3<br>(17.5-19.2) | 21.2<br>(19.0-23.1) | 17.1<br>(16.3-17.9) | 19.1<br>(17.3-20.2) | 11.7<br>(0.0-15.7) | 17.6<br>(15.1-20.4) | 19.2<br>(15.0-21.4) | 17.5<br>(16.2-18.1) | 17.0<br>(15.3-18.3) |
| Dead due to UM-metastases (n=20)         | 15.9<br>(14.9-17.0) | 17.9<br>(15.9-20.2) | 15.6<br>(14.5-16.8) | 16.5<br>(15.7-16.9) | 18.2<br>(17.9-19.0) | 19.9<br>(18.9-21.5) | 16.6<br>(16.2-17.7) | 18.7<br>(18.0-19.4) | 10.5<br>(0.0-11.5) | 16.3<br>(15.2-17.3) | 17.2<br>(15.6-19.5) | 17.3<br>(16.9-18.0) | 16.3<br>(15.8-16.9) |
| <i>p</i> - value <sup>†</sup>            | <b>0.03</b>         | <b>0.00</b>         | <b>0.00</b>         | <b>0.00</b>         | <b>0.08</b>         | <b>0.00</b>         | <b>0.00</b>         | <b>0.00</b>         | <b>0.03</b>        | <b>0.00</b>         | <b>0.00</b>         | <b>0.04</b>         | <b>0.00</b>         |

\*References for gene function are listed in Supplementary Table 1. Genes with a differential expression are highlighted in color. n: number. <sup>†</sup>Mann-Whitney U test · <sup>††</sup>Kruskal-Wallis test

**Table S3.** Genes with a higher expression level in the monosomy-3 tumors regardless of the gene copy number (n = 9).

| Supplementary Table S3                                                                                                             |                                             |                     |                                                 |                     |                     |                     |                   |                    |                     |
|------------------------------------------------------------------------------------------------------------------------------------|---------------------------------------------|---------------------|-------------------------------------------------|---------------------|---------------------|---------------------|-------------------|--------------------|---------------------|
| Genes with a higher expression level in the monosomy-3 tumors regardless of the gene copy number (n=9) · Median expression (range) |                                             |                     |                                                 |                     |                     |                     |                   |                    |                     |
| Function*                                                                                                                          | #1,2. Dual regulators of glycogen synthesis |                     | #3-9. Negative regulators of glycogen synthesis |                     |                     |                     |                   |                    |                     |
| Gene symbol                                                                                                                        | PGM2                                        | PGM5                | CALM1                                           | CALM2               | G6PC3               | GFPT1               | PCK1              | PPP1R14C           | PYGM                |
| Locus                                                                                                                              | 4p14                                        | 9q21.11             | 14q32.11                                        | 2p21                | 17q21.31            | 2p13.3              | 20q13.31          | 6q25.1             | 11q13.1             |
| Expression (n=80)                                                                                                                  | 17.4<br>(15.0-19.5)                         | 12.3<br>(8.3-15.5)  | 20.0<br>(18.9-20.9)                             | 19.8<br>(18.2-21.1) | 20.4<br>(18.5-22.3) | 17.0<br>(15.5-18.4) | 8.4<br>(0.0-12.8) | 10.9<br>(0.0-16.4) | 13.2<br>(10.2-16.2) |
| Age (n=80)                                                                                                                         | PGM2                                        | PGM5                | CALM1                                           | CALM2               | G6PC3               | GFPT1               | PCK1              | PPP1R14C           | PYGM                |
| ≤Median (n=40)                                                                                                                     | 17.5<br>(16.0-19.5)                         | 12.5<br>(10.0-15.0) | 20.0<br>(19.1-20.6)                             | 19.7<br>(18.5-20.7) | 20.4<br>(18.5-22.3) | 17.0<br>(15.5-18.4) | 8.3<br>(0.0-12.8) | 10.4<br>(0.0-16.4) | 13.0<br>(10.3-16.2) |
| >Median (n=40)                                                                                                                     | 17.3<br>(15.0-18.9)                         | 12.2<br>(8.3-15.5)  | 19.9<br>(18.9-20.9)                             | 20.0<br>(18.2-21.1) | 20.4<br>(18.8-22.0) | 17.0<br>(15.5-18.4) | 8.7<br>(0.0-12.2) | 11.0<br>(0.0-14.8) | 13.3<br>(10.2-16.0) |

|                                  |                     |                     |                     |                     |                     |                     |                   |                    |                     |
|----------------------------------|---------------------|---------------------|---------------------|---------------------|---------------------|---------------------|-------------------|--------------------|---------------------|
| <i>p</i> - value <sup>†</sup>    | 0.83                | 0.20                | 0.95                | 0.55                | 0.43                | 0.60                | 0.82              | 0.56               | 0.28                |
| Gender<br>(n=80)                 | PGM2                | PGM5                | CALM1               | CALM2               | G6PC3               | GFPT1               | PCK1              | PPP1R14C           | PYGM                |
| Female (n=35)                    | 17.5<br>(15.0-19.5) | 12.2<br>(8.3-14.2)  | 19.9<br>(18.9-20.6) | 19.8<br>(18.5-20.7) | 20.4<br>(18.7-21.7) | 16.9<br>(15.5-18.4) | 8.9<br>(0.0-12.8) | 11.1<br>(0.0-16.4) | 13.4<br>(11.0-16.2) |
| Male (n=45)                      | 17.4<br>(15.8-18.9) | 12.3<br>(10.0-15.5) | 20.0<br>(19.1-20.9) | 19.9<br>(18.2-21.1) | 20.5<br>(18.5-22.3) | 17.0<br>(15.8-18.4) | 8.3<br>(0.0-11.7) | 9.9<br>(0.0-14.4)  | 13.0<br>(10.2-15.7) |
| <i>p</i> - value <sup>†</sup>    | 0.62                | 0.72                | 0.46                | 0.74                | 0.74                | 0.93                | 0.48              | 0.57               | 0.17                |
| Eye color<br>(n=30)              | PGM2                | PGM5                | CALM1               | CALM2               | G6PC3               | GFPT1               | PCK1              | PPP1R14C           | PYGM                |
| Brown (n=15)                     | 17.1<br>(15.8-19.5) | 12.0<br>(10.0-15.0) | 20.0<br>(19.4-20.5) | 19.6<br>(18.2-20.7) | 20.7<br>(19.9-22.3) | 16.9<br>(15.5-18.0) | 7.3<br>(0.0-11.7) | 9.9<br>(0.0-14.4)  | 12.5<br>(11.5-15.7) |
| Green (n=6)                      | 17.9<br>(17.5-18.9) | 12.0<br>(8.3-14.3)  | 19.8<br>(19.4-20.0) | 19.8<br>(19.0-21.1) | 20.4<br>(18.8-21.4) | 16.9<br>(16.3-18.4) | 8.8<br>(7.6-10.1) | 12.0<br>(0.0-14.8) | 13.7<br>(12.2-14.5) |
| Blue (n=9)                       | 17.2<br>(15.0-18.4) | 12.4<br>(11.0-13.7) | 19.9<br>(18.9-20.6) | 19.7<br>(18.7-20.5) | 20.6<br>(18.9-21.7) | 16.6<br>(15.7-17.8) | 9.0<br>(0.0-12.2) | 9.9<br>(0.0-16.4)  | 13.9<br>(11.0-16.0) |
| <i>p</i> - value <sup>††</sup>   | 0.13                | 0.85                | 0.58                | 0.96                | 0.61                | 0.40                | 0.50              | 0.91               | 0.42                |
| Largest Basal Diameter<br>(n=74) | PGM2                | PGM5                | CALM1               | CALM2               | G6PC3               | GFPT1               | PCK1              | PPP1R14C           | PYGM                |
| ≤13 mm (n=12)                    | 16.9<br>(16.0-18.9) | 11.9<br>(8.3-13.9)  | 19.9<br>(18.9-20.4) | 19.5<br>(18.5-21.1) | 20.6<br>(18.7-21.7) | 16.6<br>(15.7-18.4) | 7.0<br>(0.0-10.1) | 9.0<br>(0.0-11.9)  | 12.8<br>(10.6-15.4) |
| >13 mm (n=62)                    | 17.5<br>(15.0-19.5) | 12.3<br>(10.5-15.5) | 20.0<br>(18.9-20.9) | 20.0<br>(18.2-20.7) | 20.4<br>(18.5-22.3) | 17.0<br>(15.5-18.4) | 8.9<br>(0.0-12.8) | 11.3<br>(0.0-14.8) | 13.2<br>(10.2-16.2) |
| <i>p</i> - value <sup>†</sup>    | 0.25                | 0.19                | 0.88                | 0.11                | 0.64                | <b>0.06</b>         | <b>0.04</b>       | <b>0.03</b>        | 0.45                |
| Tumor thickness<br>(n=76)        | PGM2                | PGM5                | CALM1               | CALM2               | G6PC3               | GFPT1               | PCK1              | PPP1R14C           | PYGM                |
| < Median (n=37)                  | 17.4<br>(15.9-18.9) | 12.5<br>(10.3-15.5) | 19.9<br>(18.9-20.9) | 19.9<br>(18.5-20.6) | 20.4<br>(18.7-22.3) | 16.9<br>(15.5-18.3) | 8.8<br>(0.0-12.2) | 10.8<br>(0.0-14.7) | 13.1<br>(10.2-16.0) |
| ≥ Median (n=39)                  | 17.4<br>(15.0-19.5) | 12.0<br>(8.3-14.3)  | 20.0<br>(18.9-20.8) | 19.6<br>(18.2-21.1) | 20.5<br>(18.5-22.0) | 17.0<br>(15.5-18.4) | 8.3<br>(0.0-12.8) | 11.3<br>(0.0-14.8) | 13.2<br>(10.3-16.2) |
| <i>p</i> - value <sup>†</sup>    | 0.96                | 0.20                | 0.43                | 0.26                | 0.39                | 0.67                | 0.98              | 0.96               | 0.93                |
| AJCC Stage, clinical<br>(n=80)   | PGM2                | PGM5                | CALM1               | CALM2               | G6PC3               | GFPT1               | PCK1              | PPP1R14C           | PYGM                |
| Stage IIA and -B (n=36)          | 17.2<br>(15.0-18.9) | 12.0<br>(10.3-13.9) | 19.9<br>(18.9-20.8) | 19.7<br>(18.5-20.6) | 20.2<br>(18.7-21.9) | 16.8<br>(15.5-18.0) | 7.6<br>(0.0-9.9)  | 9.6<br>(0.0-13.7)  | 13.0<br>(10.2-15.4) |
| Stage IIIA-C<br>(n=40)           | 17.5<br>(15.8-19.5) | 12.4<br>(8.3-15.5)  | 20.0<br>(19.1-20.9) | 19.8<br>(18.2-21.1) | 20.5<br>(18.5-22.3) | 17.0<br>(15.5-18.4) | 9.0<br>(0.0-12.8) | 11.6<br>(0.0-14.8) | 13.4<br>(10.3-16.2) |
| Stage IV<br>(n=4)                | 18.0<br>(17.5-18.4) | 13.0<br>(12.4-13.4) | 20.2<br>(20.1-20.6) | 20.3<br>(20.1-20.5) | 20.7<br>(19.8-21.5) | 17.5<br>(16.6-17.8) | 9.9<br>(6.1-12.2) | 14.1<br>(9.6-16.4) | 13.7<br>(12.8-16.0) |

|                                             |                     |                     |                     |                     |                     |                     |                   |                    |                     |
|---------------------------------------------|---------------------|---------------------|---------------------|---------------------|---------------------|---------------------|-------------------|--------------------|---------------------|
| <i>p</i> - value <sup>††</sup>              | <b>0.06</b>         | 0.12                | <b>0.06</b>         | <b>0.06</b>         | 0.24                | 0.26                | <b>0.01</b>       | <b>&lt;0.01</b>    | <b>0.08</b>         |
| Extrascleral Extension<br>(n=80)            | PGM2                | PGM5                | CALM1               | CALM2               | G6PC3               | GFPT1               | PCK1              | PPP1R14C           | PYGM                |
| No (n=71)                                   | 17.4<br>(15.0-19.5) | 12.3<br>(8.3-15.5)  | 19.9<br>(18.9-20.9) | 19.8<br>(18.2-20.7) | 20.4<br>(18.5-22.3) | 16.9<br>(15.5-18.4) | 8.3<br>(0.0-12.8) | 9.9<br>(0.0-16.4)  | 13.1<br>(10.2-16.2) |
| Yes (n=9)                                   | 17.5<br>(16.4-18.9) | 12.4<br>(10.9-14.4) | 20.1<br>(19.6-20.4) | 20.2<br>(19.6-21.1) | 20.7<br>(19.1-21.9) | 17.6<br>(16.6-18.4) | 9.2<br>(0.0-12.2) | 11.9<br>(8.7-14.8) | 13.9<br>(11.5-16.0) |
| <i>p</i> - value <sup>†</sup>               | 0.36                | 0.65                | 0.25                | <b>0.06</b>         | 0.30                | <b>0.04</b>         | <b>0.06</b>       | <b>&lt;0.05</b>    | 0.16                |
| BAP1 expression<br>(n=80)                   | PGM2                | PGM5                | CALM1               | CALM2               | G6PC3               | GFPT1               | PCK1              | PPP1R14C           | PYGM                |
| >Median (n=40)                              | 17.1<br>(15.0-18.3) | 12.0<br>(8.3-14.2)  | 19.7<br>(18.9-20.4) | 19.5<br>(18.2-20.3) | 20.1<br>(18.5-21.7) | 16.6<br>(15.5-17.5) | 7.1<br>(0.0-10.3) | 8.0<br>(0.0-14.4)  | 12.5<br>(10.2-15.7) |
| ≤Median (n=40)                              | 17.9<br>(16.5-19.5) | 12.6<br>(10.5-15.5) | 20.2<br>(19.2-20.9) | 20.1<br>(19.1-21.1) | 20.6<br>(18.9-22.3) | 17.4<br>(16.5-18.4) | 9.3<br>(0.0-12.8) | 12.3<br>(0.0-16.4) | 13.8<br>(10.3-16.2) |
| <i>p</i> - value <sup>†</sup>               | <b>&lt;0.01</b>     | <b>&lt;0.01</b>     | <b>&lt;0.01</b>     | <b>&lt;0.01</b>     | <b>&lt;0.01</b>     | <b>&lt;0.01</b>     | <b>&lt;0.01</b>   | <b>&lt;0.01</b>    | <b>&lt;0.01</b>     |
| Morphology<br>(n=80)                        | PGM2                | PGM5                | CALM1               | CALM2               | G6PC3               | GFPT1               | PCK1              | PPP1R14C           | PYGM                |
| Spindle (n=43)                              | 17.3<br>(15.0-18.7) | 12.0<br>(8.3-14.3)  | 19.8<br>(18.9-20.6) | 19.6<br>(18.2-20.5) | 20.1<br>(18.5-21.7) | 16.8<br>(15.5-17.9) | 7.5<br>(0.0-12.8) | 8.9<br>(0.0-16.4)  | 12.7<br>(10.3-16.0) |
| Mixed / Spindle (n=14)                      | 17.2<br>(16.1-18.2) | 12.7<br>(10.7-15.5) | 20.0<br>(19.4-20.9) | 19.6<br>(18.7-20.2) | 20.6<br>(18.8-21.9) | 16.8<br>(15.8-17.7) | 8.9<br>(0.0-10.3) | 11.7<br>(0.0-14.4) | 13.5<br>(11.4-16.2) |
| Mixed / Epithelioid (n=7)                   | 17.6<br>(16.5-18.2) | 12.9<br>(11.9-14.4) | 20.1<br>(19.9-20.4) | 20.1<br>(19.7-20.2) | 20.4<br>(19.4-22.3) | 17.4<br>(16.9-18.3) | 9.5<br>(0.0-11.7) | 12.2<br>(9.2-13.2) | 14.0<br>(10.2-15.6) |
| Epithelioid (n=16)                          | 17.9<br>(16.5-19.5) | 12.5<br>(11.6-14.2) | 20.2<br>(19.4-20.8) | 20.1<br>(19.6-21.1) | 20.6<br>(19.1-21.6) | 17.9<br>(16.6-18.4) | 9.3<br>(0.0-11.4) | 12.1<br>(9.7-14.8) | 13.6<br>(11.2-15.5) |
| <i>p</i> - value <sup>††</sup>              | <b>0.06</b>         | <b>0.02</b>         | <b>&lt;0.01</b>     | <b>&lt;0.01</b>     | 0.19                | <b>&lt;0.01</b>     | <b>0.01</b>       | <b>&lt;0.01</b>    | <b>0.05</b>         |
| Closed connective tissue<br>loops<br>(n=80) | PGM2                | PGM5                | CALM1               | CALM2               | G6PC3               | GFPT1               | PCK1              | PPP1R14C           | PYGM                |
| Absent (n=38)                               | 17.1<br>(15.0-19.5) | 12.0<br>(10.0-15.0) | 19.8<br>(18.9-20.8) | 19.6<br>(18.2-20.7) | 20.2<br>(18.5-21.9) | 16.8<br>(15.5-18.0) | 7.5<br>(0.0-9.9)  | 8.9<br>(0.0-14.4)  | 13.0<br>(10.2-15.4) |
| Present (n=42)                              | 17.7<br>(16.0-18.9) | 12.5<br>(8.3-15.5)  | 20.0<br>(19.2-20.9) | 20.0<br>(19.0-21.1) | 20.5<br>(18.9-22.3) | 17.1<br>(15.5-18.4) | 9.1<br>(0.0-12.8) | 11.8<br>(0.0-16.4) | 13.5<br>(10.3-16.2) |
| <i>p</i> - value <sup>†</sup>               | <b>&lt;0.01</b>     | 0.23                | <b>0.01</b>         | <b>&lt;0.01</b>     | 0.35                | <b>&lt;0.01</b>     | <b>&lt;0.01</b>   | <b>&lt;0.01</b>    | <b>0.02</b>         |
| Mitotic count<br>(n=80)                     | PGM2                | PGM5                | CALM1               | CALM2               | G6PC3               | GFPT1               | PCK1              | PPP1R14C           | PYGM                |
| 0-5 (n=63)                                  | 17.3<br>(15.0-18.9) | 12.2<br>(8.3-15.0)  | 19.9<br>(18.9-20.8) | 19.7<br>(18.2-21.1) | 20.4<br>(18.5-22.3) | 16.9<br>(15.5-18.4) | 8.1<br>(0.0-12.8) | 9.8<br>(0.0-14.8)  | 13.0<br>(10.2-16.2) |
| >5-10 (n=11)                                | 17.6<br>(16.8-18.4) | 12.4<br>(11.1-15.5) | 20.1<br>(19.4-20.9) | 20.0<br>(19.2-20.5) | 20.0<br>(19.1-21.7) | 16.9<br>(15.8-18.4) | 9.3<br>(6.1-12.2) | 11.9<br>(0.0-16.4) | 13.9<br>(11.4-16.0) |

|                                               |                     |                     |                     |                     |                     |                     |                   |                     |                     |
|-----------------------------------------------|---------------------|---------------------|---------------------|---------------------|---------------------|---------------------|-------------------|---------------------|---------------------|
| >11 (n=6)                                     | 17.7<br>(16.9-19.5) | 12.6<br>(12.0-13.1) | 20.2<br>(19.7-20.4) | 20.1<br>(19.9-20.7) | 20.6<br>(19.2-22.0) | 17.5<br>(16.6-18.0) | 9.6<br>(7.2-9.9)  | 11.9<br>(7.9-13.3)  | 13.0<br>(11.5-13.7) |
| <i>p</i> - value <sup>††</sup>                | 0.14                | 0.66                | 0.18                | 0.10                | 0.83                | 0.25                | <b>0.01</b>       | <b>0.05</b>         | <b>0.09</b>         |
| Tumor infiltrating lymphocytes density (n=80) | PGM2                | PGM5                | CALM1               | CALM2               | G6PC3               | GFPT1               | PCK1              | PPP1R14C            | PYGM                |
| Mild (n=71)                                   | 17.5<br>(15.0-19.5) | 12.2<br>(8.3-15.5)  | 19.9<br>(18.9-20.9) | 19.8<br>(18.2-21.1) | 20.3<br>(18.5-22.3) | 16.9<br>(15.5-18.4) | 8.3<br>(0.0-12.8) | 9.9<br>(0.0-16.4)   | 13.0<br>(10.2-16.2) |
| Moderate (n=7)                                | 17.4<br>(16.0-17.9) | 13.5<br>(12.5-14.2) | 20.3<br>(19.7-20.5) | 20.2<br>(18.5-20.6) | 20.7<br>(19.1-21.3) | 17.8<br>(16.6-18.0) | 9.1<br>(0.0-11.4) | 13.2<br>(9.8-14.2)  | 13.9<br>(13.2-15.5) |
| Heavy (n=2)                                   | 17.1<br>(16.9-17.3) | 12.2<br>(11.8-12.7) | 20.3<br>(20.1-20.6) | 19.7<br>(19.6-19.8) | 21.2<br>(20.6-21.9) | 17.6<br>(17.4-17.7) | 9.3<br>(8.6-9.9)  | 11.9<br>(11.6-12.2) | 13.7<br>(13.5-13.9) |
| <i>p</i> - value <sup>††</sup>                | 0.77                | <b>0.04</b>         | <b>0.02</b>         | 0.32                | 0.26                | <b>0.05</b>         | 0.19              | <b>0.05</b>         | <b>0.03</b>         |
| Tumor infiltrating macrophages density (n=80) | PGM2                | PGM5                | CALM1               | CALM2               | G6PC3               | GFPT1               | PCK1              | PPP1R14C            | PYGM                |
| Mild (n=40)                                   | 17.5<br>(16.1-18.7) | 12.3<br>(10.7-15.5) | 19.8<br>(18.9-20.9) | 19.8<br>(18.8-20.5) | 19.9<br>(18.5-21.7) | 17.0<br>(15.5-18.4) | 7.4<br>(0.0-12.8) | 9.6<br>(0.0-16.4)   | 12.8<br>(10.2-16.2) |
| Moderate (n=29)                               | 17.3<br>(15.8-19.5) | 12.3<br>(8.3-14.2)  | 20.0<br>(19.5-20.5) | 19.9<br>(18.2-21.1) | 20.7<br>(19.1-22.0) | 17.0<br>(15.5-18.4) | 9.0<br>(0.0-11.4) | 11.6<br>(0.0-14.8)  | 13.4<br>(10.6-15.7) |
| Heavy (n=11)                                  | 16.7<br>(15.0-18.9) | 11.9<br>(10.0-15.0) | 20.2<br>(18.9-20.8) | 19.7<br>(18.5-20.4) | 20.8<br>(19.9-22.3) | 17.2<br>(15.9-18.0) | 9.1<br>(0.0-11.7) | 9.8<br>(0.0-12.8)   | 13.5<br>(11.4-15.6) |
| <i>p</i> - value <sup>††</sup>                | 0.30                | 0.90                | <b>0.06</b>         | 0.56                | <b>&lt;0.01</b>     | 0.91                | 0.10              | 0.20                | <b>0.05</b>         |
| Pigmentation (n=80)                           | PGM2                | PGM5                | CALM1               | CALM2               | G6PC3               | GFPT1               | PCK1              | PPP1R14C            | PYGM                |
| Mild (n=39)                                   | 17.5<br>(16.1-18.7) | 12.3<br>(10.5-15.5) | 19.9<br>(18.9-20.9) | 19.9<br>(18.8-20.6) | 19.9<br>(18.5-21.7) | 17.0<br>(15.7-18.4) | 7.5<br>(0.0-12.8) | 9.9<br>(0.0-16.4)   | 12.9<br>(10.2-16.2) |
| Moderate (n=27)                               | 17.2<br>(15.8-18.9) | 12.7<br>(10.0-14.4) | 20.1<br>(19.4-20.6) | 19.9<br>(18.2-21.1) | 20.7<br>(19.8-22.0) | 17.1<br>(15.5-18.4) | 8.9<br>(0.0-12.2) | 11.6<br>(0.0-14.7)  | 13.4<br>(11.4-16.0) |
| Heavy (n=14)                                  | 17.0<br>(15.0-19.5) | 12.0<br>(8.3-15.0)  | 20.0<br>(18.9-20.8) | 19.6<br>(18.5-20.7) | 20.9<br>(19.9-22.3) | 17.1<br>(16.2-18.0) | 9.3<br>(0.0-11.7) | 11.4<br>(0.0-14.8)  | 13.7<br>(10.6-15.6) |
| <i>p</i> - value <sup>††</sup>                | 0.30                | 0.64                | 0.15                | 0.50                | <b>&lt;0.01</b>     | 0.99                | <b>0.07</b>       | 0.56                | <b>0.06</b>         |
| Necrosis (n=80)                               | PGM2                | PGM5                | CALM1               | CALM2               | G6PC3               | GFPT1               | PCK1              | PPP1R14C            | PYGM                |
| Absent (n=63)                                 | 17.5<br>(15.8-19.5) | 12.4<br>(10.0-15.5) | 20.0<br>(18.9-20.9) | 19.8<br>(18.2-21.1) | 20.3<br>(18.7-22.3) | 16.9<br>(15.5-18.4) | 8.3<br>(0.0-12.8) | 9.9<br>(0.0-16.4)   | 13.0<br>(10.2-16.2) |
| Present (n=17)                                | 17.3<br>(15.0-18.9) | 12.2<br>(8.3-14.2)  | 20.0<br>(18.9-20.7) | 20.0<br>(18.7-20.6) | 20.5<br>(18.5-22.0) | 17.1<br>(16.0-18.0) | 9.2<br>(0.0-11.4) | 11.6<br>(0.0-14.8)  | 13.5<br>(11.4-15.5) |
| <i>p</i> - value <sup>†</sup>                 | 0.90                | 0.37                | 0.84                | 0.37                | 0.18                | 0.37                | 0.14              | 0.34                | 0.34                |
| Body-Mass-Index                               | PGM2                | PGM5                | CALM1               | CALM2               | G6PC3               | GFPT1               | PCK1              | PPP1R14C            | PYGM                |





| 1. De novo glycogen synthesis**                |          |              |                 |                          |                          |       |                 |             |                          |                          |       |             |             |
|------------------------------------------------|----------|--------------|-----------------|--------------------------|--------------------------|-------|-----------------|-------------|--------------------------|--------------------------|-------|-------------|-------------|
| GBE1                                           | 3p12.2   | ILMN_1789702 | 65.5 ± 86.9     | 42.2<br>(4.7_585.5)      | 29.0<br>(0.8_171.5)      | -1.46 | 0.09            | 1.00        | 37.7<br>(0.8_210.2)      | 43.2<br>(2.9_585.5)      | 1.15  | 0.71        | 1.00        |
| GYG1                                           | 3q24     | ILMN_2230862 | 235.3 ± 225.3   | 132.0<br>(9.9_887.9)     | 105.7<br>(31.8_755.8)    | -1.25 | 0.85            | 1.00        | 110.8<br>(31.8_773.2)    | 105.7<br>(9.9_887.9)     | -1.05 | 0.47        | 1.00        |
| GYG2                                           | Xp22.33  | ILMN_2245686 | 1.2 ± 8.5       | -0.5<br>(-5.8_28.1)      | -0.7<br>(-7.3_43.0)      | n.a.  | 0.38            | 1.00        | -0.9<br>(-7.3_28.1)      | -0.3<br>(-5.8_43.0)      | n.a.  | 0.36        | 1.00        |
|                                                |          | ILMN_2319424 | 1065.9 ± 754.1  | 1091.4<br>(273.9_5024.6) | 660.4<br>(181.8_1602.9)  | -1.65 | <b>0.00</b>     | <b>0.04</b> | 1252.1<br>(655.4_5024.6) | 631.9<br>(181.8_2439.0)  | -1.98 | <b>0.00</b> | <b>0.01</b> |
|                                                |          | ILMN_1684017 | 117.4 ± 99.7    | 129.5<br>(-4.5_625.5)    | 67.1<br>(-3.0_200.8)     | -1.93 | <b>0.02</b>     | 0.52        | 139.7<br>(0.2_625.5)     | 65.6<br>(-4.5_313.5)     | -2.13 | <b>0.00</b> | <b>0.02</b> |
| 2. Positive regulators of glycogen synthesis** |          |              |                 |                          |                          |       |                 |             |                          |                          |       |             |             |
| ATG7                                           | 3p25.3   | ILMN_1790978 | 164.0 ± 86.6    | 172.0<br>(4.2_392.6)     | 114.2<br>(27.2_335.6)    | -1.51 | <b>0.01</b>     | 0.29        | 130.5<br>(11.0_334.3)    | 168.6<br>(4.2_392.6)     | 1.29  | 0.29        | 1.00        |
| BAP1                                           | 3p21.1   | ILMN_1768363 | 87.2 ± 65.6     | 96.4<br>(-0.4_251.8)     | 56.2<br>(-1.0_184.2)     | -1.72 | <b>0.01</b>     | 0.13        | 65.9<br>(2.4_205.4)      | 89.9<br>(-1.0_251.8)     | 1.36  | 0.14        | 1.00        |
| EPM2A                                          | 6q24.3   | ILMN_1719468 | 34.1 ± 22.9     | 33.4<br>(-4.5_95.6)      | 24.7<br>(-7.6_63.7)      | -1.35 | 0.09            | 1.00        | 37.1<br>(-4.5_95.6)      | 25.1<br>(-7.6_93.5)      | -1.48 | 0.10        | 1.00        |
|                                                |          | ILMN_1788156 | 0.8 ± 4.3       | 0.9<br>(-4.2_22.2)       | -0.7<br>(-5.9_5.4)       | n.a.  | <b>&lt;0.05</b> | 1.00        | 0.6<br>(-5.9_22.2)       | 0.1<br>(-4.2_7.4)        | -6.00 | 0.35        | 1.00        |
| INSR                                           | 19p13.2  | ILMN_1670918 | 8.3 ± 8.8       | 7.0<br>(-1.6_20.7)       | 7.0<br>(-1.6_49.1)       | 1.00  | 0.85            | 1.00        | 5.7<br>(-1.4_18.1)       | 7.2<br>(-1.6_49.1)       | 1.26  | 0.71        | 1.00        |
| IRS2                                           | 13q34    | ILMN_2083469 | 531.3 ± 463.8   | 381.3<br>(58.9_1794.7)   | 309.6<br>(48.3_1461.4)   | -1.23 | 0.82            | 1.00        | 366.2<br>(58.9_1696.2)   | 392.0<br>(48.3_1794.7)   | 1.07  | 0.71        | 1.00        |
| IRS4                                           | Xq22.3   | ILMN_1712774 | 25.5 ± 37.1     | 17.8<br>(6.5_215.7)      | 14.4<br>(3.9_52.9)       | -1.24 | 0.29            | 1.00        | 12.2<br>(6.5_215.7)      | 17.8<br>(3.9_199.8)      | 1.46  | 0.32        | 1.00        |
| PPP1R3B                                        | 8p23.1   | ILMN_2131103 | -0.5 ± 3.5      | -0.7<br>(-7.4_10.0)      | -1.8<br>(-7.3_5.8)       | n.a.  | 0.34            | 1.00        | -1.3<br>(-7.4_10.0)      | -1.3<br>(-7.3_6.3)       | n.a.  | 0.87        | 1.00        |
| PPP1R3C                                        | 10q23.32 | ILMN_1736670 | 418.5 ± 507.6   | 352.4<br>(-0.7_2020.3)   | 85.9<br>(-1.6_2063.4)    | -4.1  | <b>0.01</b>     | 0.22        | 209.8<br>(21.7_1774.9)   | 155.6<br>(-1.6_2063.4)   | -1.35 | 0.37        | 1.00        |
| 3. Negative regulators of glycogen synthesis** |          |              |                 |                          |                          |       |                 |             |                          |                          |       |             |             |
| CALM1                                          | 14q32.11 | ILMN_1778242 | 1194.4 ± 611.7  | 1013.2<br>(457.7_2604.7) | 987.3<br>(422.5_2908.2)  | -1.03 | 1.00            | 1.00        | 1077.5<br>(457.7_2908.2) | 865.3<br>(422.5_2055.0)  | -1.25 | 0.10        | 1.00        |
| CALM2                                          | 2p21     | ILMN_1687858 | 2341.5 ± 1318.3 | 2381.2<br>(677.6_4147.6) | 2303.9<br>(536.1_6124.7) | -1.03 | 0.71            | 1.00        | 2043.8<br>(708.3_4479.9) | 2468.1<br>(536.1_6124.7) | 1.21  | 0.33        | 1.00        |
| G6PC3                                          | 17q21.31 | ILMN_2127477 | 467.7 ± 265.9   | 395.5<br>(37.9_1361.0)   | 425.2<br>(35.1_1120.1)   | 1.08  | 0.75            | 1.00        | 412.1<br>(133.3_1361.0)  | 412.9<br>(35.1_1120.1)   | 1.00  | 0.87        | 1.00        |

|                                            |          |                  |               |                         |                         |       |      |      |                         |                         |       |      |      |
|--------------------------------------------|----------|------------------|---------------|-------------------------|-------------------------|-------|------|------|-------------------------|-------------------------|-------|------|------|
| GFPT1                                      | 2p13.3   | ILMN_<br>2220187 | 241.9 ± 151.7 | 168.3<br>(63.5_770.3)   | 229.3<br>(137.1_931.7)  | 1.36  | 0.05 | 1.00 | 174.5<br>(110.8_393.6)  | 206.3<br>(63.5_931.7)   | 1.18  | 0.33 | 1.00 |
| GSK3B                                      | 3q13.33  | ILMN_<br>1779376 | 525.6 ± 418.5 | 408.4<br>(88.1_1572.4)  | 528.1<br>(77.2_1942.5)  | 1.29  | 0.85 | 1.00 | 404.0<br>(88.1_1572.4)  | 563.3<br>(77.2_1942.5)  | 1.39  | 0.08 | 1.00 |
| PCK1                                       | 20q13.31 | ILMN_<br>2197381 | -2.7 ± 3.8    | -3.9<br>(-9.9_5.9)      | -2.4<br>(-9.0_5.8)      | n.a.  | 0.45 | 1.00 | -3.9<br>(-9.9_5.9)      | -2.4<br>(-9.0_4.6)      | n.a.  | 0.57 | 1.00 |
| PHKA2                                      | Xp22.13  | ILMN_<br>1814074 | 846.8 ± 643.3 | 623.7<br>(109.6_2289.3) | 679.1<br>(167.3_2590.5) | 1.09  | 0.80 | 1.00 | 567.1<br>(136.7_1946.6) | 726.5<br>(109.6_2590.5) | 1.28  | 0.11 | 1.00 |
| PPP1R14C                                   | 6q25.1   | ILMN_<br>1664855 | -0.4 ± 5.6    | -2.4<br>(-7.8_14.7)     | -0.5<br>(-8.3_24.7)     | n.a.  | 0.40 | 1.00 | -2.4<br>(-7.8_24.7)     | -0.8<br>(-8.3_14.7)     | n.a.  | 0.39 | 1.00 |
| PYGM                                       | 11q13.1  | ILMN_<br>1720849 | 1.1 ± 4.6     | 0.4<br>(-5.0_13.0)      | 0.6<br>(-7.7_19.2)      | 1.50  | 0.97 | 1.00 | 0.2<br>(-7.7_7.3)       | 0.6<br>(-5.0_19.2)      | 3.00  | 0.45 | 1.00 |
| 4. Dual regulators of glycogen synthesis** |          |                  |               |                         |                         |       |      |      |                         |                         |       |      |      |
| PGM2                                       | 4p14     | ILMN_<br>1673543 | 98.2 ± 64.4   | 84.4<br>(24.6_265.5)    | 90.0<br>(1.1_318.3)     | 1.07  | 0.19 | 1.00 | 86.0<br>(1.1_254.9)     | 82.0<br>(24.3_318.3)    | -1.05 | 0.94 | 1.00 |
| PGM5                                       | 9q21.11  | ILMN_<br>2271149 | 2.5 ± 9.1     | 1.1<br>(-6.6_47.8)      | -0.1<br>(-5.8_37.7)     | n.a.  | 0.09 | 1.00 | 0.9<br>(-5.1_37.7)      | 0.3<br>(-6.6_47.8)      | -3.00 | 0.09 | 1.00 |
|                                            |          | ILMN_<br>1781388 | 9.3 ± 19.2    | 3.6<br>(-4.0_107.0)     | 3.0<br>(-4.1_78.9)      | -1.20 | 0.78 | 1.00 | 3.8<br>(-4.1_30.9)      | 2.6<br>(-3.2_107.0)     | -1.46 | 0.95 | 1.00 |
|                                            |          | ILMN_<br>1709590 | 16.8 ± 21.7   | 10.0<br>(-3.6_115.2)    | 8.8<br>(0.2_44.9)       | -1.14 | 0.54 | 1.00 | 13.1<br>(-0.2_94.0)     | 7.4<br>(-3.6_115.2)     | -1.77 | 0.28 | 1.00 |

GEO: Gene Expression Omnibus; n.a.: not analyzed; TCGA: The Cancer Genome Atlas; UM: Uveal melanoma.

Multiple probes were available for GYG2, EPM2A, and PGM5. Genes with a differential expression are indicated in bold.

\*Fold changes were calculated only for the probes with positive median values after background subtraction. Negative fold change values indicate the downregulation of genes.

\*\*References for gene function provided in the main text. † Mann-Whitney U test. †† with Bonferroni correction.

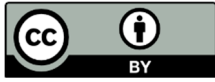

© 2020 by the authors. Submitted for possible open access publication under the terms and conditions of the Creative Commons Attribution (CC BY) license (<http://creativecommons.org/licenses/by/4.0/>).
